# Supplementary material for: Effects of Harvest on the Sustainability and Leaf Productivity of Populations of Two Palm Species in Maya Homegardens
Source: PLoS One. 2015 Mar 24;10(3):e0120666. doi: 10.1371/journal.pone.0120666 (PMC4372575; doi:10.1371/journal.pone.0120666)
Supplement: S1 Dataset — (XLSX) [file pone.0120666.s002.xlsx]

## Sheet: variables
Variable name	Meaning
Size or category at time t	Stem size in cm or category to which stemless individuals belong (see main text for definitions)
Size or category at time t + 1	As above. A size of 0 was assigned to individuals that died.
Survival	1= alive at time t+1, 0=dead at time t+1
Fruit production	Total number of fruits produced by the individual
Total leaves at time t	Number of standing leaves in the palm
Leaves harvested	Number of leaves harvested from time t to t+1
Proportion of leaves harvested	The ratio of the two above variables
Leaves produced	Leaves produced from time t to t+1

## Sheet: transitions
Homegarden	Species	Year	Size or category at time t	Size or category at time t+1	survival	Fruit production	Total leaves at time t	Leaves harvested
H1	S. mexicana	1998	NA	617	1	3312.45	15	8
H1	S. mexicana	1998	NA	1055	1	4173.34	23	13
H1	S. mexicana	1998	I1	I1	1	0	5	0
H1	S. mexicana	1998	I1	I1	1	0	4	0
H1	S. mexicana	1998	I1	I1	1	0	4	0
H1	S. mexicana	1998	I1	I2	1	0	4	0
H1	S. mexicana	1998	I1	I1	1	0	3	0
H1	S. mexicana	1998	I1	I1	1	0	3	0
H1	S. mexicana	1998	I1	I1	1	0	4	0
H1	S. mexicana	1998	I1	I1	1	0	3	0
H1	S. mexicana	1998	I1	I1	1	0	3	0
H1	S. mexicana	1998	I1	I1	1	0	3	0
H1	S. mexicana	1998	I1	I1	1	0	3	0
H1	S. mexicana	1998	I1	I1	1	0	2	0
H1	S. mexicana	1998	I1	I2	1	0	3	0
H1	S. mexicana	1998	I1	I1	1	0	4	0
H1	S. mexicana	1998	I1	I1	1	0	4	0
H1	S. mexicana	1998	I1	0	0	0	0	0
H1	S. mexicana	1998	I1	I1	1	0	6	0
H1	S. mexicana	1998	I1	I1	1	0	3	0
H1	S. mexicana	1998	I1	I1	1	0	3	0
H1	S. mexicana	1998	I1	I1	1	0	3	0
H1	S. mexicana	1998	I1	0	0	0	0	0
H1	S. mexicana	1998	I1	I1	1	0	4	0
H1	S. mexicana	1998	I1	I2	1	0	4	0
H1	S. mexicana	1998	I1	I1	1	0	3	0
H1	S. mexicana	1998	I1	I2	1	0	4	0
H1	S. mexicana	1998	I1	0	0	0	0	0
H1	S. mexicana	1998	I1	I1	1	0	4	0
H1	S. mexicana	1998	I1	I1	1	0	4	0
H1	S. mexicana	1998	I1	I1	1	0	5	0
H1	S. mexicana	1998	I1	I1	1	0	3	0
H1	S. mexicana	1998	I2	I2	1	0	2	0
H1	S. mexicana	1998	I2	I2	1	0	5	0
H1	S. mexicana	1998	I2	I3	1	0	4	0
H1	S. mexicana	1998	I2	I2	1	0	4	0
H1	S. mexicana	1998	I2	I2	1	0	3	0
H1	S. mexicana	1998	I2	I2	1	0	6	0
H1	S. mexicana	1998	I2	I3	1	0	7	0
H1	S. mexicana	1998	I2	I2	1	0	4	0
H1	S. mexicana	1998	I2	0	0	0	0	0
H1	S. mexicana	1998	I2	I3	1	0	5	0
H1	S. mexicana	1998	I2	I2	1	0	3	0
H1	S. mexicana	1998	I2	I2	1	0	4	0
H1	S. mexicana	1998	I2	I2	1	0	4	0
H1	S. mexicana	1998	I2	I3	1	0	6	0
H1	S. mexicana	1998	I2	I2	1	0	0	0
H1	S. mexicana	1998	I2	I2	1	0	3	0
H1	S. mexicana	1998	I2	I3	1	0	3	0
H1	S. mexicana	1998	I3	I3	1	0	4	0
H1	S. mexicana	1998	I3	I3	1	0	5	0
H1	S. mexicana	1998	I3	I3	1	0	4	0
H1	S. mexicana	1998	I3	I3	1	0	6	0
H1	S. mexicana	1998	I3	I3	1	0	0	0
H1	S. mexicana	1998	I3	7	1	0	0	0
H1	S. mexicana	1998	I3	9	1	0	0	0
H1	S. mexicana	1998	I3	I3	1	0	4	0
H1	S. mexicana	1998	I3	I3	1	0	6	0
H1	S. mexicana	1998	I3	I3	1	0	0	0
H1	S. mexicana	1998	I3	I3	1	0	0	0
H1	S. mexicana	1998	I3	I3	1	0	0	0
H1	S. mexicana	1998	I3	13	1	0	0	0
H1	S. mexicana	1998	I3	I3	1	0	0	0
H1	S. mexicana	1998	I3	I3	1	0	0	0
H1	S. mexicana	1998	I3	I3	1	0	3	0
H1	S. mexicana	1998	I3	I3	1	0	4	0
H1	S. mexicana	1998	I3	I3	1	0	4	0
H1	S. mexicana	1998	I3	I3	1	0	4	0
H1	S. mexicana	1998	I3	I3	1	0	5	0
H1	S. mexicana	1998	I3	I3	1	0	11	0
H1	S. mexicana	1998	I3	I3	1	0	0	0
H1	S. mexicana	1998	I3	I3	1	0	0	0
H1	S. mexicana	1998	P1	0	0	0	0	0
H1	S. mexicana	1998	P1	0	0	0	0	0
H1	S. mexicana	1998	P1	P2	1	0	2	0
H1	S. mexicana	1998	P1	P2	1	0	3	0
H1	S. mexicana	1998	P1	0	0	0	0	0
H1	S. mexicana	1998	P1	P2	1	0	2	0
H1	S. mexicana	1998	P1	0	0	0	0	0
H1	S. mexicana	1998	P1	0	0	0	0	0
H1	S. mexicana	1998	P1	0	0	0	0	0
H1	S. mexicana	1998	P1	P1	1	0	1	0
H1	S. mexicana	1998	P2	I1	1	0	4	0
H1	S. mexicana	1998	P2	0	0	0	0	0
H1	S. mexicana	1998	P2	P2	1	0	2	0
H1	S. mexicana	1998	P2	P2	1	0	1	0
H1	S. mexicana	1998	P2	P2	1	0	2	0
H1	S. mexicana	1998	P2	P2	1	0	3	0
H1	S. mexicana	1998	P2	P2	1	0	2	0
H1	S. mexicana	1998	P2	P2	1	0	2	0
H1	S. mexicana	1998	P2	P2	1	0	3	0
H1	S. mexicana	1998	P2	P2	1	0	4	0
H1	S. mexicana	1998	P2	I1	1	0	3	0
H1	S. mexicana	1998	P2	P2	1	0	0	0
H1	S. mexicana	1998	P2	P2	1	0	3	0
H1	S. mexicana	1998	P2	P2	1	0	3	0
H1	S. mexicana	1998	P2	P2	1	0	2	0
H1	S. mexicana	1998	P2	0	0	0	0	0
H1	S. mexicana	1998	P2	0	0	0	0	0
H1	S. mexicana	1998	P2	0	0	0	0	0
H1	S. mexicana	1998	P2	P2	1	0	3	0
H1	S. mexicana	1998	P2	P2	1	0	0	0
H1	S. mexicana	1998	P2	P2	1	0	0	0
H1	S. mexicana	1998	P2	0	0	0	0	0
H1	S. mexicana	1998	P2	0	0	0	0	0
H1	S. mexicana	1998	P2	0	0	0	0	0
H1	S. mexicana	1998	P2	0	0	0	0	0
H1	S. mexicana	1998	P2	P2	1	0	2	0
H1	S. mexicana	1998	P2	0	0	0	0	0
H1	S. mexicana	1998	P2	0	0	0	0	0
H1	S. mexicana	1998	P2	P2	1	0	4	0
H1	S. mexicana	1998	P2	P2	1	0	4	0
H1	S. mexicana	1998	P2	P2	1	0	5	0
H1	S. mexicana	1998	P2	0	0	0	0	0
H1	S. mexicana	1998	P2	0	0	0	0	0
H1	S. mexicana	1998	P2	0	0	0	0	0
H1	S. mexicana	1998	P2	P2	1	0	3	0
H1	S. mexicana	1998	P2	P2	1	0	2	0
H1	S. mexicana	1998	P2	P2	1	0	3	0
H1	S. mexicana	1998	P2	P2	1	0	4	0
H1	S. mexicana	1998	P2	P2	1	0	2	0
H1	S. mexicana	1998	P2	P2	1	0	3	0
H1	S. mexicana	1998	P2	P2	1	0	2	0
H1	S. mexicana	1998	P2	P2	1	0	3	0
H1	S. mexicana	1998	P2	P2	1	0	3	0
H1	S. mexicana	1998	P2	P2	1	0	2	0
H1	S. mexicana	1998	P2	0	0	0	0	0
H1	S. mexicana	1998	P2	0	0	0	0	0
H1	S. mexicana	1998	P2	P2	1	0	5	0
H1	S. mexicana	1998	P2	P2	1	0	2	0
H1	S. mexicana	1998	P2	P2	1	0	1	0
H1	S. mexicana	1998	6	12	1	0	4	0
H1	S. mexicana	1998	7	6	1	0	5	0
H1	S. mexicana	1998	10	12	1	0	4	0
H1	S. mexicana	1998	12	12	1	0	6	1
H1	S. mexicana	1998	12	18	1	0	7	2
H1	S. mexicana	1998	12	13	1	0	6	2
H1	S. mexicana	1998	13	14	1	0	9	1
H1	S. mexicana	1998	14	16	1	0	7	0
H1	S. mexicana	1998	14	12	1	0	6	1
H1	S. mexicana	1998	15	20	1	0	7	2
H1	S. mexicana	1998	15	19	1	0	8	0
H1	S. mexicana	1998	16	17	1	0	6	0
H1	S. mexicana	1998	20	26	1	0	6	0
H1	S. mexicana	1998	20	25	1	0	7	0
H1	S. mexicana	1998	24	29	1	0	4	0
H1	S. mexicana	1998	27	0	0	0	1	0
H1	S. mexicana	1998	27	31	1	0	7	0
H1	S. mexicana	1998	28	25	1	0	5	1
H1	S. mexicana	1998	30	41	1	0	7	2
H1	S. mexicana	1998	30	33	1	0	9	0
H1	S. mexicana	1998	30	36	1	0	6	2
H1	S. mexicana	1998	30	35	1	0	4	0
H1	S. mexicana	1998	38	42	1	0	7	3
H1	S. mexicana	1998	51	51	1	0	4	0
H1	S. mexicana	1998	52	55	1	0	6	1
H1	S. mexicana	1998	52	54	1	0	6	1
H1	S. mexicana	1998	52	45	1	0	6	3
H1	S. mexicana	1998	53	58	1	0	3	0
H1	S. mexicana	1998	55	NA	1	0	1	0
H1	S. mexicana	1998	55	58	1	0	5	0
H1	S. mexicana	1998	62	79	1	0	7	3
H1	S. mexicana	1998	62	NA	1	0	2	0
H1	S. mexicana	1998	66	69	1	0	5	2
H1	S. mexicana	1998	69	68	1	0	5	0
H1	S. mexicana	1998	71	92	1	0	6	1
H1	S. mexicana	1998	73	69	1	0	4	1
H1	S. mexicana	1998	75	0	0	0	1	0
H1	S. mexicana	1998	75	74	1	0	5	2
H1	S. mexicana	1998	84	92	1	0	6	3
H1	S. mexicana	1998	91	96	1	0	7	1
H1	S. mexicana	1998	137	137	1	0	5	1
H1	S. mexicana	1998	168	184	1	0	5	1
H1	S. mexicana	1998	174	181	1	0	5	1
H1	S. mexicana	1998	178	189	1	0	9	3
H1	S. mexicana	1998	214	235	1	0	11	0
H1	S. mexicana	1998	247	266	1	0	1	0
H1	S. mexicana	1998	256	294	1	0	14	3
H1	S. mexicana	1998	259	276	1	0	5	NA
H1	S. mexicana	1998	300	305	1	0	5	NA
H1	S. mexicana	1998	325	344	1	0	8	0
H1	S. mexicana	1998	352	362	1	0	7	0
H1	S. mexicana	1998	378	425	1	0	12	0
H1	S. mexicana	1998	383	411	1	903.839	5	0
H1	S. mexicana	1998	391	401	1	0	5	0
H1	S. mexicana	1998	423	460	1	1381.3	5	0
H1	S. mexicana	1998	549	651	1	3967.37	19	0
H1	S. mexicana	1998	555	550	1	0	15	0
H1	S. mexicana	1998	570	592	1	2916.26	13	0
H1	S. mexicana	1998	587	585	1	0	12	0
H1	S. mexicana	1998	781	766	1	4594.12	11	0
H1	S. mexicana	1998	787	795	1	2601.73	7	0
H1	S. mexicana	1998	788	821	1	2637.45	18	0
H1	S. mexicana	1998	810	806	1	5453.61	27	13
H1	S. mexicana	1998	815	852	1	1422.22	20	0
H1	S. mexicana	1998	869	868	1	1420.36	20	0
H1	S. mexicana	1998	872	912	1	3518.07	16	16
H1	S. mexicana	1998	898	893	1	2793.22	26	9
H1	S. mexicana	1998	922	926	1	2970.64	18	8
H1	S. mexicana	1998	942	882	1	390.464	17	8
H1	S. mexicana	1998	987	991	1	1452.97	9	0
H1	S. mexicana	1999	P2	0	0	0	0	0
H1	S. mexicana	1999	P2	0	0	0	0	0
H1	S. mexicana	1999	P1	P2	1	0	3	0
H1	S. mexicana	1999	P2	0	0	0	0	0
H1	S. mexicana	1999	P1	0	0	0	0	0
H1	S. mexicana	1999	P2	P2	1	0	1	0
H1	S. mexicana	1999	P1	0	0	0	0	0
H1	S. mexicana	1999	P1	0	0	0	0	0
H1	S. mexicana	1999	P2	0	0	0	0	0
H1	S. mexicana	1999	P2	0	0	0	0	0
H1	S. mexicana	1999	P2	P2	1	0	3	0
H1	S. mexicana	1999	P2	P2	1	0	3	0
H1	S. mexicana	1999	P2	0	0	0	0	0
H1	S. mexicana	1999	P1	0	0	0	0	0
H1	S. mexicana	1999	P2	P2	1	0	3	0
H1	S. mexicana	1999	P2	0	0	0	0	0
H1	S. mexicana	1999	P2	0	0	0	0	0
H1	S. mexicana	1999	P2	P2	1	0	3	0
H1	S. mexicana	1999	P2	0	0	0	0	0
H1	S. mexicana	1999	P1	P2	1	0	2	0
H1	S. mexicana	1999	P1	P2	1	0	2	0
H1	S. mexicana	1999	P2	P2	1	0	3	0
H1	S. mexicana	1999	P2	P2	1	0	4	0
H1	S. mexicana	1999	P1	P2	1	0	3	0
H1	S. mexicana	1999	P2	P2	1	0	3	0
H1	S. mexicana	1999	P1	P2	1	0	3	0
H1	S. mexicana	1999	P2	P2	1	0	3	0
H1	S. mexicana	1999	P1	P2	1	0	2	0
H1	S. mexicana	1999	P2	P2	1	0	0	0
H1	S. mexicana	1999	P1	0	0	0	0	0
H1	S. mexicana	1999	P1	P2	1	0	3	0
H1	S. mexicana	1999	P1	P2	1	0	3	0
H1	S. mexicana	1999	P2	P2	1	0	3	0
H1	S. mexicana	1999	P1	P2	1	0	2	0
H1	S. mexicana	1999	P1	0	0	0	0	0
H1	S. mexicana	1999	P1	0	0	0	0	0
H1	S. mexicana	1999	P2	0	0	0	0	0
H1	S. mexicana	1999	P2	0	0	0	0	0
H1	S. mexicana	1999	P2	P2	1	0	4	0
H1	S. mexicana	1999	P2	P2	1	0	2	0
H1	S. mexicana	1999	P2	P2	1	0	4	0
H1	S. mexicana	1999	P1	0	0	0	0	0
H1	S. mexicana	1999	P2	0	0	0	0	0
H1	S. mexicana	1999	P1	0	0	0	0	0
H1	S. mexicana	1999	P1	0	0	0	0	0
H1	S. mexicana	1999	P1	0	0	0	0	0
H1	S. mexicana	1999	P2	P2	1	0	3	0
H1	S. mexicana	1999	P2	P2	1	0	1	0
H1	S. mexicana	1999	P1	0	0	0	0	0
H1	S. mexicana	1999	P1	P2	1	0	0	0
H1	S. mexicana	1999	P2	0	0	0	0	0
H1	S. mexicana	1999	P2	0	0	0	0	0
H1	S. mexicana	1999	P2	0	0	0	0	0
H1	S. mexicana	1999	P2	P2	1	0	2	0
H1	S. mexicana	1999	P1	0	0	0	0	0
H1	S. mexicana	1999	P1	0	0	0	0	0
H1	S. mexicana	1999	P2	P2	1	0	5	0
H1	S. mexicana	1999	P2	0	0	0	0	0
H1	S. mexicana	1999	P2	0	0	0	0	0
H1	S. mexicana	1999	P2	0	0	0	0	0
H1	S. mexicana	1999	P2	0	0	0	0	0
H1	S. mexicana	1999	P2	0	0	0	0	0
H1	S. mexicana	1999	P2	0	0	0	0	0
H1	S. mexicana	1999	P2	P2	1	0	3	0
H1	S. mexicana	1999	P1	0	0	0	0	0
H1	S. mexicana	1999	P2	P2	1	0	2	0
H1	S. mexicana	1999	P1	0	0	0	0	0
H1	S. mexicana	1999	P1	0	0	0	0	0
H1	S. mexicana	1999	P1	0	0	0	0	0
H1	S. mexicana	1999	P2	0	0	0	0	0
H1	S. mexicana	1999	P1	0	0	0	0	0
H1	S. mexicana	1999	P2	0	0	0	0	0
H1	S. mexicana	1999	P2	0	0	0	0	0
H1	S. mexicana	1999	P1	0	0	0	0	0
H1	S. mexicana	1999	P1	0	0	0	0	0
H1	S. mexicana	1999	P1	0	0	0	0	0
H1	S. mexicana	1999	P2	0	0	0	0	0
H1	S. mexicana	1999	P2	0	0	0	0	0
H1	S. mexicana	1999	P2	0	0	0	0	0
H1	S. mexicana	1999	P1	0	0	0	0	0
H1	S. mexicana	1999	P2	0	0	0	0	0
H1	S. mexicana	1999	P1	P2	1	0	2	0
H1	S. mexicana	1999	P1	0	0	0	0	0
H1	S. mexicana	1999	P1	0	0	0	0	0
H1	S. mexicana	1999	P1	0	0	0	0	0
H1	S. mexicana	1999	P1	0	0	0	0	0
H1	S. mexicana	1999	P1	0	0	0	0	0
H1	S. mexicana	1999	P1	0	0	0	0	0
H1	S. mexicana	1999	P2	P2	1	0	3	0
H1	S. mexicana	1999	P1	0	0	0	0	0
H1	S. mexicana	1999	P2	0	0	0	0	0
H1	S. mexicana	1999	P2	0	0	0	0	0
H1	S. mexicana	1999	P2	0	0	0	0	0
H1	S. mexicana	1999	P2	0	0	0	0	0
H1	S. mexicana	1999	P1	0	0	0	0	0
H1	S. mexicana	1999	P2	P2	1	0	2	0
H1	S. mexicana	1999	P2	0	0	0	0	0
H1	S. mexicana	1999	P2	0	0	0	0	0
H1	S. mexicana	1999	P1	0	0	0	0	0
H1	S. mexicana	1999	P1	0	0	0	0	0
H1	S. mexicana	1999	P1	0	0	0	0	0
H1	S. mexicana	1999	P1	0	0	0	0	0
H1	S. mexicana	1999	P2	0	0	0	0	0
H1	S. mexicana	1999	P2	P2	1	0	2	0
H1	S. mexicana	1999	P2	0	0	0	0	0
H1	S. mexicana	1999	P1	0	0	0	0	0
H1	S. mexicana	1999	P2	0	0	0	0	0
H1	S. mexicana	1999	P2	0	0	0	0	0
H1	S. mexicana	1999	P1	0	0	0	0	0
H1	S. mexicana	1999	P1	P2	1	0	2	0
H1	S. mexicana	1999	P2	P2	1	0	2	0
H1	S. mexicana	1999	P1	P2	1	0	2	0
H1	S. mexicana	1999	P1	0	0	0	0	0
H1	S. mexicana	1999	I1	I2	1	0	5	0
H1	S. mexicana	1999	I1	I2	1	0	3	0
H1	S. mexicana	1999	I1	I2	1	0	5	0
H1	S. mexicana	1999	I2	I2	1	0	5	0
H1	S. mexicana	1999	I1	I1	1	0	5	0
H1	S. mexicana	1999	I1	I1	1	0	3	0
H1	S. mexicana	1999	I1	I1	1	0	4	0
H1	S. mexicana	1999	I1	I2	1	0	3	0
H1	S. mexicana	1999	P2	0	0	0	0	0
H1	S. mexicana	1999	P2	I1	1	0	3	0
H1	S. mexicana	1999	I1	0	0	0	0	0
H1	S. mexicana	1999	I1	I1	1	0	3	0
H1	S. mexicana	1999	I2	0	0	0	0	0
H1	S. mexicana	1999	I1	I2	1	0	3	0
H1	S. mexicana	1999	I1	I1	1	0	5	0
H1	S. mexicana	1999	I1	I2	1	0	6	0
H1	S. mexicana	1999	I1	I2	1	0	4	0
H1	S. mexicana	1999	I1	I2	1	0	4	0
H1	S. mexicana	1999	I1	I2	1	0	3	0
H1	S. mexicana	1999	I1	I1	1	0	4	0
H1	S. mexicana	1999	I2	I2	1	0	4	0
H1	S. mexicana	1999	I1	I2	1	0	3	0
H1	S. mexicana	1999	I2	I3	1	0	4	0
H1	S. mexicana	1999	I1	I2	1	0	4	0
H1	S. mexicana	1999	I1	I2	1	0	5	0
H1	S. mexicana	1999	I1	I2	1	0	4	0
H1	S. mexicana	1999	I1	I1	1	0	3	0
H1	S. mexicana	1999	I2	I3	1	0	4	0
H1	S. mexicana	1999	I2	I3	1	0	5	0
H1	S. mexicana	1999	I3	I3	1	0	5	0
H1	S. mexicana	1999	I2	I2	1	0	4	0
H1	S. mexicana	1999	I2	I3	1	0	7	0
H1	S. mexicana	1999	I2	I3	1	0	5	0
H1	S. mexicana	1999	I3	I3	1	0	7	0
H1	S. mexicana	1999	I2	I2	1	0	2	0
H1	S. mexicana	1999	I3	I3	1	0	6	0
H1	S. mexicana	1999	I2	I2	1	0	4	0
H1	S. mexicana	1999	I2	I2	1	0	5	0
H1	S. mexicana	1999	I2	I3	1	0	4	0
H1	S. mexicana	1999	I3	I3	1	0	5	0
H1	S. mexicana	1999	I2	I3	1	0	5	0
H1	S. mexicana	1999	I2	I2	1	0	4	0
H1	S. mexicana	1999	I3	I3	1	0	5	0
H1	S. mexicana	1999	I3	I3	1	0	4	0
H1	S. mexicana	1999	I3	0	0	0	0	0
H1	S. mexicana	1999	I3	I3	1	0	6	2
H1	S. mexicana	1999	I3	I3	1	0	0	0
H1	S. mexicana	1999	I3	I3	1	0	4	0
H1	S. mexicana	1999	I3	I3	1	0	6	0
H1	S. mexicana	1999	I3	I3	1	0	8	0
H1	S. mexicana	1999	I3	14	1	0	9	0
H1	S. mexicana	1999	I3	I3	1	0	6	0
H1	S. mexicana	1999	I3	7	1	0	9	0
H1	S. mexicana	1999	I3	I3	1	0	3	0
H1	S. mexicana	1999	I3	7	1	0	7	0
H1	S. mexicana	1999	I3	I3	1	0	4	0
H1	S. mexicana	1999	I3	I3	1	0	4	0
H1	S. mexicana	1999	I3	I3	1	0	5	0
H1	S. mexicana	1999	I3	I3	1	0	5	0
H1	S. mexicana	1999	I3	I3	1	0	4	0
H1	S. mexicana	1999	I3	I3	1	0	9	3
H1	S. mexicana	1999	I3	I3	1	0	9	3
H1	S. mexicana	1999	I3	14	1	0	14	1
H1	S. mexicana	1999	NA	78	1	0	8	5
H1	S. mexicana	1999	NA	69	1	0	6	5
H1	S. mexicana	1999	P2	0	0	0	0	0
H1	S. mexicana	1999	P2	P2	1	0	3	0
H1	S. mexicana	1999	P2	P2	1	0	2	0
H1	S. mexicana	1999	P1	0	0	0	0	0
H1	S. mexicana	1999	I1	0	0	0	0	0
H1	S. mexicana	1999	P2	0	0	0	0	0
H1	S. mexicana	1999	P2	0	0	0	0	0
H1	S. mexicana	1999	P2	P2	1	0	3	0
H1	S. mexicana	1999	P2	P2	1	0	1	0
H1	S. mexicana	1999	P2	P2	1	0	3	0
H1	S. mexicana	1999	P2	0	0	0	0	0
H1	S. mexicana	1999	P2	0	0	0	0	0
H1	S. mexicana	1999	P2	P2	1	0	3	0
H1	S. mexicana	1999	I1	0	0	0	0	0
H1	S. mexicana	1999	P2	I1	1	0	1	0
H1	S. mexicana	1999	P2	P2	1	0	3	0
H1	S. mexicana	1999	P2	P2	1	0	2	0
H1	S. mexicana	1999	P2	P2	1	0	3	0
H1	S. mexicana	1999	P2	P2	1	0	4	0
H1	S. mexicana	1999	P2	P2	1	0	0	0
H1	S. mexicana	1999	P2	P2	1	0	0	0
H1	S. mexicana	1999	P2	P2	1	0	3	0
H1	S. mexicana	1999	P2	0	0	0	0	0
H1	S. mexicana	1999	P2	0	0	0	0	0
H1	S. mexicana	1999	P2	P2	1	0	6	0
H1	S. mexicana	1999	P2	P2	1	0	3	0
H1	S. mexicana	1999	P2	P2	1	0	3	0
H1	S. mexicana	1999	P2	P2	1	0	3	0
H1	S. mexicana	1999	P2	P2	1	0	5	0
H1	S. mexicana	1999	P2	P2	1	0	4	0
H1	S. mexicana	1999	P2	P2	1	0	2	0
H1	S. mexicana	1999	P2	0	0	0	0	0
H1	S. mexicana	1999	P2	P2	1	0	5	0
H1	S. mexicana	1999	P2	0	0	0	0	0
H1	S. mexicana	1999	P2	P2	1	0	2	0
H1	S. mexicana	1999	P2	P2	1	0	4	0
H1	S. mexicana	1999	P2	0	0	0	0	0
H1	S. mexicana	1999	P2	0	0	0	0	0
H1	S. mexicana	1999	6	14	1	0	10	0
H1	S. mexicana	1999	7	7	1	0	9	0
H1	S. mexicana	1999	9	7	1	0	7	0
H1	S. mexicana	1999	12	13	1	0	8	0
H1	S. mexicana	1999	12	21	1	0	9	3
H1	S. mexicana	1999	12	11	1	0	10	4
H1	S. mexicana	1999	12	23	1	0	5	0
H1	S. mexicana	1999	13	10	1	0	9	0
H1	S. mexicana	1999	13	19	1	0	9	0
H1	S. mexicana	1999	14	30	1	0	8	0
H1	S. mexicana	1999	16	17	1	0	8	3
H1	S. mexicana	1999	17	17	1	0	9	1
H1	S. mexicana	1999	18	23	1	0	8	0
H1	S. mexicana	1999	19	14	1	0	8	3
H1	S. mexicana	1999	20	24	1	0	10	3
H1	S. mexicana	1999	25	23	1	0	10	1
H1	S. mexicana	1999	25	39	1	0	9	0
H1	S. mexicana	1999	26	22	1	0	8	0
H1	S. mexicana	1999	29	28	1	0	7	3
H1	S. mexicana	1999	31	22	1	0	11	5
H1	S. mexicana	1999	33	37	1	0	7	2
H1	S. mexicana	1999	35	31	1	0	8	1
H1	S. mexicana	1999	36	42	1	0	7	4
H1	S. mexicana	1999	41	50	1	0	8	4
H1	S. mexicana	1999	42	52	1	0	8	0
H1	S. mexicana	1999	45	60	1	0	8	3
H1	S. mexicana	1999	51	60	1	0	10	2
H1	S. mexicana	1999	54	72	1	0	9	4
H1	S. mexicana	1999	55	73	1	0	10	5
H1	S. mexicana	1999	58	58	1	0	7	0
H1	S. mexicana	1999	58	64	1	0	7	2
H1	S. mexicana	1999	68	76	1	0	12	6
H1	S. mexicana	1999	69	0	0	0	NA	NA
H1	S. mexicana	1999	69	73	1	0	7	2
H1	S. mexicana	1999	74	76	1	0	10	7
H1	S. mexicana	1999	79	79	1	0	14	8
H1	S. mexicana	1999	92	95	1	0	11	6
H1	S. mexicana	1999	92	105	1	0	8	2
H1	S. mexicana	1999	96	116	1	0	10	2
H1	S. mexicana	1999	137	145	1	0	13	6
H1	S. mexicana	1999	181	191	1	0	10	2
H1	S. mexicana	1999	184	212	1	0	13	6
H1	S. mexicana	1999	189	215	1	0	9	5
H1	S. mexicana	1999	235	260	1	0	22	10
H1	S. mexicana	1999	266	290	1	0	16	5
H1	S. mexicana	1999	276	284	1	0	7	0
H1	S. mexicana	1999	294	310	1	0	9	0
H1	S. mexicana	1999	305	309	1	0	8	0
H1	S. mexicana	1999	344	363	1	0	8	0
H1	S. mexicana	1999	362	374	1	0	7	0
H1	S. mexicana	1999	401	417	1	0	10	0
H1	S. mexicana	1999	411	428	1	903.839	10	0
H1	S. mexicana	1999	425	431	1	0	2	0
H1	S. mexicana	1999	460	468	1	1381.3	7	0
H1	S. mexicana	1999	550	556	1	0	25	0
H1	S. mexicana	1999	585	626	1	0	19	0
H1	S. mexicana	1999	592	0	0	0	0	0
H1	S. mexicana	1999	617	640	1	3312.45	15	0
H1	S. mexicana	1999	651	712	1	3967.37	23	0
H1	S. mexicana	1999	766	779	1	4594.12	21	0
H1	S. mexicana	1999	795	833	1	2601.73	9	0
H1	S. mexicana	1999	806	932	1	5453.61	26	0
H1	S. mexicana	1999	821	858	1	2637.45	23	0
H1	S. mexicana	1999	852	883	1	1422.22	20	0
H1	S. mexicana	1999	868	867	1	1420.36	26	0
H1	S. mexicana	1999	882	1004	1	390.464	5	0
H1	S. mexicana	1999	893	900	1	2793.22	10	0
H1	S. mexicana	1999	912	930	1	3518.07	11	0
H1	S. mexicana	1999	926	905	1	2970.64	14	0
H1	S. mexicana	1999	991	1013	1	1452.97	5	0
H1	S. mexicana	1999	1055	1029	1	4173.34	18	0
H1	S. mexicana	2000	P1	0	0	0	0	0
H1	S. mexicana	2000	P1	0	0	0	0	0
H1	S. mexicana	2000	P2	0	0	0	0	0
H1	S. mexicana	2000	P2	0	0	0	0	0
H1	S. mexicana	2000	P2	0	0	0	0	0
H1	S. mexicana	2000	P2	0	0	0	0	0
H1	S. mexicana	2000	P2	0	0	0	0	0
H1	S. mexicana	2000	P1	0	0	0	0	0
H1	S. mexicana	2000	P2	0	0	0	0	0
H1	S. mexicana	2000	P2	0	0	0	0	0
H1	S. mexicana	2000	P2	0	0	0	0	0
H1	S. mexicana	2000	P2	0	0	0	0	0
H1	S. mexicana	2000	P1	0	0	0	0	0
H1	S. mexicana	2000	P2	0	0	0	0	0
H1	S. mexicana	2000	P2	0	0	0	0	0
H1	S. mexicana	2000	P2	0	0	0	0	0
H1	S. mexicana	2000	P2	0	0	0	0	0
H1	S. mexicana	2000	P2	0	0	0	0	0
H1	S. mexicana	2000	P2	0	0	0	0	0
H1	S. mexicana	2000	P2	P2	1	0	0	0
H1	S. mexicana	2000	P2	0	0	0	0	0
H1	S. mexicana	2000	P1	0	0	0	0	0
H1	S. mexicana	2000	P1	0	0	0	0	0
H1	S. mexicana	2000	P2	0	0	0	0	0
H1	S. mexicana	2000	P1	0	0	0	0	0
H1	S. mexicana	2000	P2	0	0	0	0	0
H1	S. mexicana	2000	P2	0	0	0	0	0
H1	S. mexicana	2000	P2	0	0	0	0	0
H1	S. mexicana	2000	P2	0	0	0	0	0
H1	S. mexicana	2000	P2	0	0	0	0	0
H1	S. mexicana	2000	P2	0	0	0	0	0
H1	S. mexicana	2000	P2	0	0	0	0	0
H1	S. mexicana	2000	P2	0	0	0	0	0
H1	S. mexicana	2000	P1	0	0	0	0	0
H1	S. mexicana	2000	P1	0	0	0	0	0
H1	S. mexicana	2000	P2	0	0	0	0	0
H1	S. mexicana	2000	P2	0	0	0	0	0
H1	S. mexicana	2000	P1	0	0	0	0	0
H1	S. mexicana	2000	P2	P2	1	0	2	0
H1	S. mexicana	2000	P1	0	0	0	0	0
H1	S. mexicana	2000	P1	0	0	0	0	0
H1	S. mexicana	2000	P2	0	0	0	0	0
H1	S. mexicana	2000	P2	0	0	0	0	0
H1	S. mexicana	2000	P2	0	0	0	0	0
H1	S. mexicana	2000	P1	0	0	0	0	0
H1	S. mexicana	2000	P2	0	0	0	0	0
H1	S. mexicana	2000	P1	P2	1	0	1	0
H1	S. mexicana	2000	P2	P2	1	0	2	0
H1	S. mexicana	2000	P2	P2	1	0	2	0
H1	S. mexicana	2000	P1	0	0	0	0	0
H1	S. mexicana	2000	P2	P2	1	0	3	0
H1	S. mexicana	2000	P2	P2	1	0	2	0
H1	S. mexicana	2000	P2	0	0	0	0	0
H1	S. mexicana	2000	P2	P2	1	0	1	0
H1	S. mexicana	2000	P2	P2	1	0	2	0
H1	S. mexicana	2000	P2	P2	1	0	3	0
H1	S. mexicana	2000	P2	P2	1	0	3	0
H1	S. mexicana	2000	P2	0	0	0	0	0
H1	S. mexicana	2000	P2	0	0	0	0	0
H1	S. mexicana	2000	P2	0	0	0	0	0
H1	S. mexicana	2000	P1	0	0	0	0	0
H1	S. mexicana	2000	P1	0	0	0	0	0
H1	S. mexicana	2000	P2	P2	1	0	3	0
H1	S. mexicana	2000	P2	P2	1	0	2	0
H1	S. mexicana	2000	P1	P2	1	0	2	0
H1	S. mexicana	2000	P2	P2	1	0	2	0
H1	S. mexicana	2000	P2	0	0	0	0	0
H1	S. mexicana	2000	P2	0	0	0	0	0
H1	S. mexicana	2000	P1	0	0	0	0	0
H1	S. mexicana	2000	P1	0	0	0	0	0
H1	S. mexicana	2000	P1	0	0	0	0	0
H1	S. mexicana	2000	P1	0	0	0	0	0
H1	S. mexicana	2000	P1	0	0	0	0	0
H1	S. mexicana	2000	P1	0	0	0	0	0
H1	S. mexicana	2000	P2	0	0	0	0	0
H1	S. mexicana	2000	P2	0	0	0	0	0
H1	S. mexicana	2000	P2	0	0	0	0	0
H1	S. mexicana	2000	P2	0	0	0	0	0
H1	S. mexicana	2000	P2	0	0	0	0	0
H1	S. mexicana	2000	P1	0	0	0	0	0
H1	S. mexicana	2000	P1	0	0	0	0	0
H1	S. mexicana	2000	P1	0	0	0	0	0
H1	S. mexicana	2000	P1	0	0	0	0	0
H1	S. mexicana	2000	P1	0	0	0	0	0
H1	S. mexicana	2000	P2	0	0	0	0	0
H1	S. mexicana	2000	P1	0	0	0	0	0
H1	S. mexicana	2000	P1	0	0	0	0	0
H1	S. mexicana	2000	P1	0	0	0	0	0
H1	S. mexicana	2000	P1	0	0	0	0	0
H1	S. mexicana	2000	P2	0	0	0	0	0
H1	S. mexicana	2000	P2	0	0	0	0	0
H1	S. mexicana	2000	P2	0	0	0	0	0
H1	S. mexicana	2000	P2	0	0	0	0	0
H1	S. mexicana	2000	P2	0	0	0	0	0
H1	S. mexicana	2000	P2	0	0	0	0	0
H1	S. mexicana	2000	P1	0	0	0	0	0
H1	S. mexicana	2000	P2	0	0	0	0	0
H1	S. mexicana	2000	P2	0	0	0	0	0
H1	S. mexicana	2000	P2	0	0	0	0	0
H1	S. mexicana	2000	P1	0	0	0	0	0
H1	S. mexicana	2000	P2	0	0	0	0	0
H1	S. mexicana	2000	P2	0	0	0	0	0
H1	S. mexicana	2000	P2	0	0	0	0	0
H1	S. mexicana	2000	P2	0	0	0	0	0
H1	S. mexicana	2000	P2	P2	1	0	2	0
H1	S. mexicana	2000	P2	0	0	0	0	0
H1	S. mexicana	2000	P2	P2	1	0	2	0
H1	S. mexicana	2000	P2	0	0	0	0	0
H1	S. mexicana	2000	P2	0	0	0	0	0
H1	S. mexicana	2000	P2	P2	1	0	2	0
H1	S. mexicana	2000	P2	0	0	0	0	0
H1	S. mexicana	2000	P2	P2	1	0	3	0
H1	S. mexicana	2000	P2	P2	1	0	2	0
H1	S. mexicana	2000	P2	0	0	0	0	0
H1	S. mexicana	2000	P2	P2	1	0	2	0
H1	S. mexicana	2000	P2	0	0	0	0	0
H1	S. mexicana	2000	P2	0	0	0	0	0
H1	S. mexicana	2000	P2	P2	1	0	2	0
H1	S. mexicana	2000	P2	0	0	0	0	0
H1	S. mexicana	2000	P2	0	0	0	0	0
H1	S. mexicana	2000	P2	P2	1	0	2	0
H1	S. mexicana	2000	P2	0	0	0	0	0
H1	S. mexicana	2000	P2	P2	1	0	3	0
H1	S. mexicana	2000	P2	0	0	0	0	0
H1	S. mexicana	2000	P2	P2	1	0	1	0
H1	S. mexicana	2000	P2	0	0	0	0	0
H1	S. mexicana	2000	P2	0	0	0	0	0
H1	S. mexicana	2000	P2	0	0	0	0	0
H1	S. mexicana	2000	P2	0	0	0	0	0
H1	S. mexicana	2000	P2	P2	1	0	3	0
H1	S. mexicana	2000	P2	0	0	0	0	0
H1	S. mexicana	2000	P2	0	0	0	0	0
H1	S. mexicana	2000	P2	0	0	0	0	0
H1	S. mexicana	2000	P2	0	0	0	0	0
H1	S. mexicana	2000	P2	0	0	0	0	0
H1	S. mexicana	2000	P2	0	0	0	0	0
H1	S. mexicana	2000	P2	0	0	0	0	0
H1	S. mexicana	2000	P2	0	0	0	0	0
H1	S. mexicana	2000	P2	0	0	0	0	0
H1	S. mexicana	2000	I2	I3	1	0	5	0
H1	S. mexicana	2000	I2	I2	1	0	6	0
H1	S. mexicana	2000	I2	I2	1	0	4	0
H1	S. mexicana	2000	I2	I2	1	0	3	0
H1	S. mexicana	2000	I1	I1	1	0	4	0
H1	S. mexicana	2000	I1	I2	1	0	2	0
H1	S. mexicana	2000	I1	I1	1	0	3	0
H1	S. mexicana	2000	I2	I2	1	0	3	0
H1	S. mexicana	2000	I1	I1	1	0	3	0
H1	S. mexicana	2000	I1	0	0	0	0	0
H1	S. mexicana	2000	I2	I2	1	0	3	0
H1	S. mexicana	2000	I1	I1	1	0	5	0
H1	S. mexicana	2000	I2	I2	1	0	7	0
H1	S. mexicana	2000	I2	I2	1	0	4	0
H1	S. mexicana	2000	I2	I2	1	0	3	0
H1	S. mexicana	2000	I2	I2	1	0	4	0
H1	S. mexicana	2000	I1	I2	1	0	3	0
H1	S. mexicana	2000	I2	I3	1	0	4	0
H1	S. mexicana	2000	I2	I2	1	0	3	0
H1	S. mexicana	2000	I3	I3	1	0	5	0
H1	S. mexicana	2000	I2	I2	1	0	1	0
H1	S. mexicana	2000	I2	I2	1	0	2	0
H1	S. mexicana	2000	I2	I2	1	0	3	0
H1	S. mexicana	2000	I1	0	0	0	NA	0
H1	S. mexicana	2000	I3	I2	1	0	4	0
H1	S. mexicana	2000	I3	I3	1	0	5	0
H1	S. mexicana	2000	I3	I3	1	0	6	0
H1	S. mexicana	2000	I2	I3	1	0	4	0
H1	S. mexicana	2000	I3	0	0	0	NA	0
H1	S. mexicana	2000	I3	I3	1	0	5	0
H1	S. mexicana	2000	I3	I3	1	0	5	0
H1	S. mexicana	2000	I2	I2	1	0	3	0
H1	S. mexicana	2000	I3	I3	1	0	5	0
H1	S. mexicana	2000	I2	I3	1	0	4	1
H1	S. mexicana	2000	I2	I3	1	0	4	0
H1	S. mexicana	2000	I3	I3	1	0	4	0
H1	S. mexicana	2000	I3	I3	1	0	6	0
H1	S. mexicana	2000	I3	I3	1	0	5	1
H1	S. mexicana	2000	I2	I3	1	0	5	3
H1	S. mexicana	2000	I3	I3	1	0	4	0
H1	S. mexicana	2000	I3	I3	1	0	6	0
H1	S. mexicana	2000	I3	7	1	0	9	3
H1	S. mexicana	2000	I3	I3	1	0	5	0
H1	S. mexicana	2000	I3	I3	1	0	6	0
H1	S. mexicana	2000	I3	I3	1	0	7	0
H1	S. mexicana	2000	I3	I3	1	0	10	3
H1	S. mexicana	2000	I3	I3	1	0	8	5
H1	S. mexicana	2000	I3	I3	1	0	6	3
H1	S. mexicana	2000	I3	I3	1	0	2	0
H1	S. mexicana	2000	I3	I3	1	0	3	0
H1	S. mexicana	2000	I3	I3	1	0	5	2
H1	S. mexicana	2000	I3	I3	1	0	6	3
H1	S. mexicana	2000	I3	8	1	0	5	4
H1	S. mexicana	2000	I3	6	1	0	7	5
H1	S. mexicana	2000	I3	I3	1	0	7	4
H1	S. mexicana	2000	P2	P2	1	0	3	0
H1	S. mexicana	2000	P2	0	0	0	0	0
H1	S. mexicana	2000	P2	0	0	0	0	0
H1	S. mexicana	2000	P2	0	0	0	0	0
H1	S. mexicana	2000	P2	0	0	0	0	0
H1	S. mexicana	2000	P2	P2	1	0	3	0
H1	S. mexicana	2000	I1	I1	1	0	3	0
H1	S. mexicana	2000	P2	P2	1	0	2	0
H1	S. mexicana	2000	P2	P2	1	0	3	0
H1	S. mexicana	2000	P2	0	0	0	0	0
H1	S. mexicana	2000	P2	P2	1	0	3	0
H1	S. mexicana	2000	P2	P2	1	0	4	0
H1	S. mexicana	2000	P2	P2	1	0	2	0
H1	S. mexicana	2000	P2	P2	1	0	3	0
H1	S. mexicana	2000	P2	0	0	0	0	0
H1	S. mexicana	2000	P2	P2	1	0	3	0
H1	S. mexicana	2000	P2	P2	1	0	4	0
H1	S. mexicana	2000	P2	0	0	0	0	0
H1	S. mexicana	2000	P2	P2	1	0	5	0
H1	S. mexicana	2000	P2	P2	1	0	3	0
H1	S. mexicana	2000	P2	P2	1	0	3	0
H1	S. mexicana	2000	P2	P2	1	0	4	0
H1	S. mexicana	2000	P2	0	0	0	0	0
H1	S. mexicana	2000	P2	P2	1	0	5	0
H1	S. mexicana	2000	7	7	1	0	8	1
H1	S. mexicana	2000	7	16	1	0	9	3
H1	S. mexicana	2000	7	12	1	0	10	5
H1	S. mexicana	2000	7	11	1	0	8	3
H1	S. mexicana	2000	10	15	1	0	9	4
H1	S. mexicana	2000	11	16	1	0	5	3
H1	S. mexicana	2000	13	20	1	0	8	4
H1	S. mexicana	2000	14	24	1	0	9	6
H1	S. mexicana	2000	14	10	1	0	8	6
H1	S. mexicana	2000	14	20	1	0	6	3
H1	S. mexicana	2000	14	22	1	0	11	9
H1	S. mexicana	2000	17	20	1	0	5	3
H1	S. mexicana	2000	17	19	1	0	8	7
H1	S. mexicana	2000	19	20	1	0	11	8
H1	S. mexicana	2000	21	16	1	0	6	4
H1	S. mexicana	2000	22	30	1	0	7	5
H1	S. mexicana	2000	22	30	1	0	8	6
H1	S. mexicana	2000	23	36	1	0	10	6
H1	S. mexicana	2000	23	20	1	0	7	4
H1	S. mexicana	2000	23	20	1	0	7	3
H1	S. mexicana	2000	24	26	1	0	8	6
H1	S. mexicana	2000	28	30	1	0	6	5
H1	S. mexicana	2000	30	32	1	0	7	4
H1	S. mexicana	2000	31	36	1	0	9	7
H1	S. mexicana	2000	37	34	1	0	3	5
H1	S. mexicana	2000	39	44	1	0	10	4
H1	S. mexicana	2000	42	44	1	0	6	5
H1	S. mexicana	2000	50	50	1	0	3	2
H1	S. mexicana	2000	52	58	1	0	10	9
H1	S. mexicana	2000	58	61	1	0	5	5
H1	S. mexicana	2000	60	70	1	0	10	8
H1	S. mexicana	2000	60	53	1	0	7	5
H1	S. mexicana	2000	64	69	1	0	5	4
H1	S. mexicana	2000	69	87	1	0	7	5
H1	S. mexicana	2000	72	70	1	0	5	5
H1	S. mexicana	2000	73	70	1	0	3	3
H1	S. mexicana	2000	73	70	1	0	7	5
H1	S. mexicana	2000	76	0	0	0	NA	0
H1	S. mexicana	2000	76	78	1	0	6	4
H1	S. mexicana	2000	78	90	1	0	9	7
H1	S. mexicana	2000	79	80	1	0	NA	NA
H1	S. mexicana	2000	95	97	1	0	NA	NA
H1	S. mexicana	2000	105	106	1	0	NA	NA
H1	S. mexicana	2000	116	133	1	0	NA	NA
H1	S. mexicana	2000	145	151	1	0	NA	NA
H1	S. mexicana	2000	191	187	1	0	9	6
H1	S. mexicana	2000	212	225	1	0	NA	NA
H1	S. mexicana	2000	215	210	1	0	NA	NA
H1	S. mexicana	2000	260	289	1	0	7	4
H1	S. mexicana	2000	284	303	1	0	9	0
H1	S. mexicana	2000	290	331	1	0	NA	NA
H1	S. mexicana	2000	309	330	1	0	7	0
H1	S. mexicana	2000	310	320	1	0	NA	NA
H1	S. mexicana	2000	363	375	1	0	6	0
H1	S. mexicana	2000	374	353	1	0	5	0
H1	S. mexicana	2000	428	433	1	903.839	4	0
H1	S. mexicana	2000	431	438	1	0	9	0
H1	S. mexicana	2000	468	470	1	1381.3	4	0
H1	S. mexicana	2000	556	584	1	0	8	6
H1	S. mexicana	2000	626	621	1	3967.37	6	0
H1	S. mexicana	2000	640	610	1	3312.45	8	6
H1	S. mexicana	2000	712	670	1	2916.26	2	0
H1	S. mexicana	2000	779	779	1	2637.45	6	4
H1	S. mexicana	2000	833	825	1	4594.12	4	0
H1	S. mexicana	2000	858	842	1	2601.73	21	0
H1	S. mexicana	2000	867	909	1	1420.36	23	0
H1	S. mexicana	2000	883	883	1	1422.22	20	0
H1	S. mexicana	2000	900	900	1	2793.22	17	0
H1	S. mexicana	2000	905	905	1	2970.64	15	0
H1	S. mexicana	2000	930	924	1	3518.07	5	0
H1	S. mexicana	2000	932	788	1	5453.61	14	0
H1	S. mexicana	2000	1004	1004	1	390.464	7	0
H1	S. mexicana	2000	1013	1013	1	1452.97	9	0
H1	S. mexicana	2000	1029	1029	1	4173.34	23	0
H1	S. yapa	1998	I1	I1	1	0	2	0
H1	S. yapa	1998	I1	I1	1	0	2	0
H1	S. yapa	1998	I1	I1	1	0	3	0
H1	S. yapa	1998	I1	I1	1	0	3	0
H1	S. yapa	1998	I1	I1	1	0	5	0
H1	S. yapa	1998	I1	I1	1	0	4	0
H1	S. yapa	1998	I1	I1	1	0	5	0
H1	S. yapa	1998	I1	I1	1	0	5	0
H1	S. yapa	1998	I1	I1	1	0	3	0
H1	S. yapa	1998	I1	I1	1	0	3	0
H1	S. yapa	1998	I1	0	0	0	0	0
H1	S. yapa	1998	I1	I1	1	0	0	0
H1	S. yapa	1998	I1	I1	1	0	3	0
H1	S. yapa	1998	I1	I1	1	0	3	0
H1	S. yapa	1998	I1	I1	1	0	0	0
H1	S. yapa	1998	I1	I1	1	0	5	0
H1	S. yapa	1998	I1	I1	1	0	3	0
H1	S. yapa	1998	I1	I1	1	0	4	0
H1	S. yapa	1998	I1	I2	1	0	6	0
H1	S. yapa	1998	I2	I2	1	0	6	0
H1	S. yapa	1998	I2	I2	1	0	4	0
H1	S. yapa	1998	I2	I2	1	0	6	0
H1	S. yapa	1998	I2	I2	1	0	4	0
H1	S. yapa	1998	I2	I2	1	0	4	0
H1	S. yapa	1998	I2	I2	1	0	5	0
H1	S. yapa	1998	I2	I2	1	0	5	0
H1	S. yapa	1998	I2	0	0	0	0	0
H1	S. yapa	1998	I2	I2	1	0	6	0
H1	S. yapa	1998	I2	I2	1	0	5	0
H1	S. yapa	1998	I2	I2	1	0	5	0
H1	S. yapa	1998	I2	I2	1	0	5	0
H1	S. yapa	1998	I2	I2	1	0	5	0
H1	S. yapa	1998	I2	I2	1	0	3	0
H1	S. yapa	1998	I2	0	0	0	0	0
H1	S. yapa	1998	I2	I2	1	0	3	0
H1	S. yapa	1998	I2	0	0	0	0	0
H1	S. yapa	1998	I2	I3	1	0	5	0
H1	S. yapa	1998	I2	I3	1	0	3	0
H1	S. yapa	1998	I2	I2	1	0	3	0
H1	S. yapa	1998	I2	I2	1	0	4	0
H1	S. yapa	1998	I2	I2	1	0	3	0
H1	S. yapa	1998	I2	I2	1	0	5	0
H1	S. yapa	1998	I3	I3	1	0	0	0
H1	S. yapa	1998	I3	I3	1	0	0	0
H1	S. yapa	1998	I3	I3	1	0	0	0
H1	S. yapa	1998	I3	I3	1	0	0	0
H1	S. yapa	1998	I3	0	0	0	0	0
H1	S. yapa	1998	I3	I3	1	0	5	0
H1	S. yapa	1998	I3	I3	1	0	4	0
H1	S. yapa	1998	I3	I3	1	0	6	0
H1	S. yapa	1998	I3	I3	1	0	6	0
H1	S. yapa	1998	I3	I3	1	0	6	0
H1	S. yapa	1998	I3	I3	1	0	7	0
H1	S. yapa	1998	I3	I3	1	0	5	0
H1	S. yapa	1998	I3	I3	1	0	4	0
H1	S. yapa	1998	I3	I3	1	0	4	0
H1	S. yapa	1998	I3	I3	1	0	0	0
H1	S. yapa	1998	I3	I3	1	0	4	0
H1	S. yapa	1998	I3	I3	1	0	6	0
H1	S. yapa	1998	I3	I3	1	0	6	0
H1	S. yapa	1998	I3	9	1	0	7	0
H1	S. yapa	1998	I3	I3	1	0	4	0
H1	S. yapa	1998	I3	I3	1	0	4	0
H1	S. yapa	1998	I3	I3	1	0	5	0
H1	S. yapa	1998	I3	I3	1	0	4	0
H1	S. yapa	1998	P1	P2	1	0	3	0
H1	S. yapa	1998	P1	0	0	0	0	0
H1	S. yapa	1998	P1	P2	1	0	2	0
H1	S. yapa	1998	P1	P2	1	0	2	0
H1	S. yapa	1998	P1	P2	1	0	2	0
H1	S. yapa	1998	P1	0	0	0	0	0
H1	S. yapa	1998	P1	0	0	0	0	0
H1	S. yapa	1998	P1	0	0	0	0	0
H1	S. yapa	1998	P1	0	0	0	0	0
H1	S. yapa	1998	P1	0	0	0	0	0
H1	S. yapa	1998	P1	0	0	0	0	0
H1	S. yapa	1998	P1	0	0	0	0	0
H1	S. yapa	1998	P2	I1	1	0	6	0
H1	S. yapa	1998	P2	P2	1	0	3	0
H1	S. yapa	1998	P2	0	0	0	0	0
H1	S. yapa	1998	P2	P2	1	0	2	0
H1	S. yapa	1998	P2	P2	1	0	2	0
H1	S. yapa	1998	P2	P2	1	0	0	0
H1	S. yapa	1998	P2	P2	1	0	3	0
H1	S. yapa	1998	P2	P2	1	0	5	0
H1	S. yapa	1998	P2	P2	1	0	0	0
H1	S. yapa	1998	P2	P2	1	0	2	0
H1	S. yapa	1998	P2	P2	1	0	2	0
H1	S. yapa	1998	P2	0	0	0	0	0
H1	S. yapa	1998	P2	0	0	0	0	0
H1	S. yapa	1998	P2	P2	1	0	5	0
H1	S. yapa	1998	P2	P2	1	0	4	0
H1	S. yapa	1998	P2	P2	1	0	5	0
H1	S. yapa	1998	P2	P2	1	0	5	0
H1	S. yapa	1998	P2	P2	1	0	3	0
H1	S. yapa	1998	P2	0	0	0	0	0
H1	S. yapa	1998	P2	0	0	0	0	0
H1	S. yapa	1998	P2	P2	1	0	0	0
H1	S. yapa	1998	P2	P2	1	0	4	0
H1	S. yapa	1998	P2	0	0	0	0	0
H1	S. yapa	1998	P2	0	0	0	0	0
H1	S. yapa	1998	P2	P2	1	0	3	0
H1	S. yapa	1998	P2	0	0	0	0	0
H1	S. yapa	1998	P2	P2	1	0	0	0
H1	S. yapa	1998	P2	P2	1	0	2	0
H1	S. yapa	1998	P2	0	0	0	0	0
H1	S. yapa	1998	P2	0	0	0	0	0
H1	S. yapa	1998	P2	P2	1	0	3	0
H1	S. yapa	1998	P2	P2	1	0	4	0
H1	S. yapa	1998	P2	0	0	0	0	0
H1	S. yapa	1998	P2	P2	1	0	4	0
H1	S. yapa	1998	P2	P2	1	0	4	0
H1	S. yapa	1998	P2	0	0	0	0	0
H1	S. yapa	1998	P2	0	0	0	0	0
H1	S. yapa	1998	P2	0	0	0	0	0
H1	S. yapa	1998	P2	P2	1	0	2	0
H1	S. yapa	1998	P2	P2	1	0	3	0
H1	S. yapa	1998	P2	0	0	0	0	0
H1	S. yapa	1998	P2	P2	1	0	4	0
H1	S. yapa	1998	P2	0	0	0	0	0
H1	S. yapa	1998	P2	0	0	0	0	0
H1	S. yapa	1998	P2	0	0	0	0	0
H1	S. yapa	1998	P2	0	0	0	0	0
H1	S. yapa	1998	P2	P2	1	0	3	0
H1	S. yapa	1998	P2	0	0	0	0	0
H1	S. yapa	1998	P2	P2	1	0	3	0
H1	S. yapa	1998	P2	P2	1	0	2	0
H1	S. yapa	1998	P2	I1	1	0	3	0
H1	S. yapa	1998	P2	0	0	0	0	0
H1	S. yapa	1998	P2	0	0	0	0	0
H1	S. yapa	1998	3	2	1	0	5	2
H1	S. yapa	1998	5	9.5	1	0	7	0
H1	S. yapa	1998	10	10	1	0	6	2
H1	S. yapa	1998	28	36	1	0	4	0
H1	S. yapa	1998	28	41	1	0	4	0
H1	S. yapa	1998	59	60	1	0	5	2
H1	S. yapa	1998	60	63	1	0	5	0
H1	S. yapa	1998	62	69	1	0	3	0
H1	S. yapa	1998	67	84	1	0	5	3
H1	S. yapa	1998	68	75	1	0	5	0
H1	S. yapa	1998	70	0	0	0	1	0
H1	S. yapa	1998	85	90	1	0	7	3
H1	S. yapa	1998	88	192	1	0	6	1
H1	S. yapa	1998	110	123	1	0	9	3
H1	S. yapa	1998	148	157	1	0	6	2
H1	S. yapa	1998	153	156	1	0	7	1
H1	S. yapa	1998	156	164	1	0	8	0
H1	S. yapa	1998	162	180	1	0	8	2
H1	S. yapa	1998	162	176	1	0	9	7
H1	S. yapa	1998	214	230	1	0	6	0
H1	S. yapa	1998	232	240	1	0	4	NA
H1	S. yapa	1998	270	300	1	0	4	NA
H1	S. yapa	1998	298	309	1	0	3	NA
H1	S. yapa	1998	300	333	1	0	4	NA
H1	S. yapa	1998	305	450	1	0	8	0
H1	S. yapa	1998	365	384	1	0	8	0
H1	S. yapa	1998	389	402	1	4021.23	13	0
H1	S. yapa	1998	412	456	1	6659.23	13	0
H1	S. yapa	1998	421	411	1	0	20	0
H1	S. yapa	1998	426	438	1	5772.15	10	0
H1	S. yapa	1998	427	428	1	0	16	0
H1	S. yapa	1998	472	475	1	2194.89	13	0
H1	S. yapa	1998	480	510	1	1305.36	18	11
H1	S. yapa	1998	564	568	1	0	11	0
H1	S. yapa	1998	606	608	1	1982.53	17	0
H1	S. yapa	1998	688	691	1	12303.2	23	14
H1	S. yapa	1999	P1	I1	1	0	4	0
H1	S. yapa	1999	P1	0	0	0	0	0
H1	S. yapa	1999	P1	0	0	0	0	0
H1	S. yapa	1999	P1	P2	1	0	4	0
H1	S. yapa	1999	P2	P2	1	0	3	0
H1	S. yapa	1999	P1	P2	1	0	3	0
H1	S. yapa	1999	P1	P2	1	0	2	0
H1	S. yapa	1999	P2	0	0	0	0	0
H1	S. yapa	1999	P1	P2	1	0	1	0
H1	S. yapa	1999	P1	P2	1	0	3	0
H1	S. yapa	1999	I1	0	0	0	0	0
H1	S. yapa	1999	I1	I1	1	0	4	0
H1	S. yapa	1999	I1	I1	1	0	4	0
H1	S. yapa	1999	I1	0	0	0	0	0
H1	S. yapa	1999	I1	I1	1	0	4	0
H1	S. yapa	1999	I1	I1	1	0	5	0
H1	S. yapa	1999	I1	I2	1	0	6	0
H1	S. yapa	1999	I1	I1	1	0	6	0
H1	S. yapa	1999	I1	I1	1	0	5	0
H1	S. yapa	1999	I1	I1	1	0	2	0
H1	S. yapa	1999	I1	I1	1	0	0	0
H1	S. yapa	1999	I1	I1	1	0	2	0
H1	S. yapa	1999	I1	I1	1	0	3	0
H1	S. yapa	1999	I1	I1	1	0	1	0
H1	S. yapa	1999	I1	I1	1	0	4	0
H1	S. yapa	1999	P2	I1	1	0	3	0
H1	S. yapa	1999	P2	I2	1	0	5	0
H1	S. yapa	1999	I2	I2	1	0	5	0
H1	S. yapa	1999	I2	I2	1	0	6	0
H1	S. yapa	1999	I2	I2	1	0	6	0
H1	S. yapa	1999	I2	I2	1	0	8	0
H1	S. yapa	1999	I2	I2	1	0	5	0
H1	S. yapa	1999	I2	I2	1	0	5	0
H1	S. yapa	1999	I2	I2	1	0	4	0
H1	S. yapa	1999	I2	I2	1	0	6	0
H1	S. yapa	1999	I2	I2	1	0	7	0
H1	S. yapa	1999	I1	I1	1	0	5	0
H1	S. yapa	1999	I2	I2	1	0	6	0
H1	S. yapa	1999	I2	I2	1	0	5	0
H1	S. yapa	1999	I2	I2	1	0	5	0
H1	S. yapa	1999	I2	I2	1	0	6	0
H1	S. yapa	1999	I2	I2	1	0	5	0
H1	S. yapa	1999	I3	I3	1	0	3	0
H1	S. yapa	1999	I3	I3	1	0	4	0
H1	S. yapa	1999	I1	I2	1	0	3	0
H1	S. yapa	1999	I2	I2	1	0	2	0
H1	S. yapa	1999	I2	0	0	0	0	0
H1	S. yapa	1999	I2	I2	1	0	8	0
H1	S. yapa	1999	I3	I3	1	0	6	0
H1	S. yapa	1999	I3	I3	1	0	7	5
H1	S. yapa	1999	I3	I3	1	0	6	3
H1	S. yapa	1999	I3	I3	1	0	2	0
H1	S. yapa	1999	I3	0	0	0	0	0
H1	S. yapa	1999	I3	I3	1	0	5	0
H1	S. yapa	1999	I3	I3	1	0	7	0
H1	S. yapa	1999	I3	I3	1	0	5	0
H1	S. yapa	1999	I3	I3	1	0	7	0
H1	S. yapa	1999	I3	I3	1	0	5	0
H1	S. yapa	1999	I3	I3	1	0	5	0
H1	S. yapa	1999	I3	I3	1	0	7	0
H1	S. yapa	1999	I2	I3	1	0	5	1
H1	S. yapa	1999	I3	I3	1	0	5	0
H1	S. yapa	1999	I3	I3	1	0	5	0
H1	S. yapa	1999	I3	I3	1	0	5	1
H1	S. yapa	1999	I3	I3	1	0	6	0
H1	S. yapa	1999	I3	I3	1	0	5	0
H1	S. yapa	1999	I3	I3	1	0	6	0
H1	S. yapa	1999	I3	I3	1	0	5	0
H1	S. yapa	1999	I3	I3	1	0	5	0
H1	S. yapa	1999	P2	P2	1	0	4	0
H1	S. yapa	1999	P2	P2	1	0	2	0
H1	S. yapa	1999	P2	P2	1	0	4	0
H1	S. yapa	1999	P2	0	0	0	0	0
H1	S. yapa	1999	I1	I1	1	0	8	0
H1	S. yapa	1999	P2	P2	1	0	2	0
H1	S. yapa	1999	P2	0	0	0	0	0
H1	S. yapa	1999	P2	P2	1	0	3	0
H1	S. yapa	1999	P2	P2	1	0	4	0
H1	S. yapa	1999	P2	P2	1	0	3	0
H1	S. yapa	1999	P2	I1	1	0	3	0
H1	S. yapa	1999	P2	P2	1	0	3	0
H1	S. yapa	1999	P2	P2	1	0	2	0
H1	S. yapa	1999	P2	P2	1	0	0	0
H1	S. yapa	1999	P2	P2	1	0	7	0
H1	S. yapa	1999	P2	0	0	0	0	0
H1	S. yapa	1999	P2	P2	1	0	4	0
H1	S. yapa	1999	P2	P2	1	0	4	0
H1	S. yapa	1999	P2	P2	1	0	5	0
H1	S. yapa	1999	P2	P2	1	0	3	0
H1	S. yapa	1999	P2	P2	1	0	4	0
H1	S. yapa	1999	P2	0	0	0	0	0
H1	S. yapa	1999	P2	P2	1	0	3	0
H1	S. yapa	1999	P2	0	0	0	0	0
H1	S. yapa	1999	P2	P2	1	0	2	0
H1	S. yapa	1999	P2	P2	1	0	4	0
H1	S. yapa	1999	P2	P2	1	0	3	0
H1	S. yapa	1999	P2	P2	1	0	4	0
H1	S. yapa	1999	P2	0	0	0	0	0
H1	S. yapa	1999	P2	0	0	0	0	0
H1	S. yapa	1999	P2	P2	1	0	3	0
H1	S. yapa	1999	P2	0	0	0	0	0
H1	S. yapa	1999	P2	0	0	0	0	0
H1	S. yapa	1999	P2	P2	1	0	4	0
H1	S. yapa	1999	I1	I1	1	0	3	0
H1	S. yapa	1999	2	4	1	0	6	2
H1	S. yapa	1999	9	NA	1	0	6	0
H1	S. yapa	1999	9.5	13	1	0	11	3
H1	S. yapa	1999	10	13	1	0	9	1
H1	S. yapa	1999	36	49	1	0	8	0
H1	S. yapa	1999	41	41	1	0	7	1
H1	S. yapa	1999	60	0	0	0	NA	0
H1	S. yapa	1999	63	63	1	0	9	2
H1	S. yapa	1999	69	71	1	0	7	1
H1	S. yapa	1999	75	78	1	0	8	2
H1	S. yapa	1999	84	87	1	0	10	6
H1	S. yapa	1999	90	91	1	0	8	4
H1	S. yapa	1999	123	127	1	0	11	5
H1	S. yapa	1999	156	164	1	0	11	5
H1	S. yapa	1999	157	179	1	0	14	5
H1	S. yapa	1999	164	168	1	0	12	4
H1	S. yapa	1999	176	184	1	0	11	7
H1	S. yapa	1999	180	190	1	0	9	5
H1	S. yapa	1999	192	108	1	0	10	4
H1	S. yapa	1999	230	246	1	0	11	1
H1	S. yapa	1999	240	243	1	0	6	NA
H1	S. yapa	1999	300	0	0	0	11	NA
H1	S. yapa	1999	309	0	0	0	9	NA
H1	S. yapa	1999	333	0	0	0	10	NA
H1	S. yapa	1999	384	0	0	0	0	0
H1	S. yapa	1999	402	0	0	4021.23	0	0
H1	S. yapa	1999	411	0	0	0	0	0
H1	S. yapa	1999	428	461	1	0	11	0
H1	S. yapa	1999	438	0	0	0	0	0
H1	S. yapa	1999	450	0	0	0	0	0
H1	S. yapa	1999	456	0	0	0	0	0
H1	S. yapa	1999	475	512	1	2194.89	7	0
H1	S. yapa	1999	510	525	1	1305.36	10	0
H1	S. yapa	1999	568	436	1	NA	3	0
H1	S. yapa	1999	608	595	1	1982.53	5	0
H1	S. yapa	1999	621	621	1	0	4	0
H1	S. yapa	1999	691	715	1	12303.2	13	0
H1	S. yapa	2000	I1	I2	1	0	5	0
H1	S. yapa	2000	P2	0	0	0	0	0
H1	S. yapa	2000	P2	0	0	0	0	0
H1	S. yapa	2000	P2	P2	1	0	1	0
H1	S. yapa	2000	P2	0	0	0	0	0
H1	S. yapa	2000	P2	0	0	0	0	0
H1	S. yapa	2000	P2	P2	1	0	5	0
H1	S. yapa	2000	P2	0	0	0	0	0
H1	S. yapa	2000	P1	0	0	0	0	0
H1	S. yapa	2000	P2	P2	1	0	4	0
H1	S. yapa	2000	P2	0	0	0	0	0
H1	S. yapa	2000	P2	0	0	0	0	0
H1	S. yapa	2000	P2	0	0	0	0	0
H1	S. yapa	2000	P2	0	0	0	0	0
H1	S. yapa	2000	P1	0	0	0	0	0
H1	S. yapa	2000	P2	0	0	0	0	0
H1	S. yapa	2000	P2	0	0	0	0	0
H1	S. yapa	2000	P2	0	0	0	0	0
H1	S. yapa	2000	P2	0	0	0	0	0
H1	S. yapa	2000	P1	0	0	0	0	0
H1	S. yapa	2000	P2	0	0	0	0	0
H1	S. yapa	2000	P2	0	0	0	0	0
H1	S. yapa	2000	P2	0	0	0	0	0
H1	S. yapa	2000	P2	0	0	0	0	0
H1	S. yapa	2000	P1	0	0	0	0	0
H1	S. yapa	2000	P2	0	0	0	0	0
H1	S. yapa	2000	P2	0	0	0	0	0
H1	S. yapa	2000	P2	0	0	0	0	0
H1	S. yapa	2000	P2	0	0	0	0	0
H1	S. yapa	2000	P1	0	0	0	0	0
H1	S. yapa	2000	P1	0	0	0	0	0
H1	S. yapa	2000	P2	0	0	0	0	0
H1	S. yapa	2000	P1	0	0	0	0	0
H1	S. yapa	2000	P2	0	0	0	0	0
H1	S. yapa	2000	P1	0	0	0	0	0
H1	S. yapa	2000	P2	0	0	0	0	0
H1	S. yapa	2000	P1	0	0	0	0	0
H1	S. yapa	2000	P2	0	0	0	0	0
H1	S. yapa	2000	P2	0	0	0	0	0
H1	S. yapa	2000	P2	0	0	0	0	0
H1	S. yapa	2000	P1	0	0	0	0	0
H1	S. yapa	2000	P2	0	0	0	0	0
H1	S. yapa	2000	P1	0	0	0	0	0
H1	S. yapa	2000	P1	0	0	0	0	0
H1	S. yapa	2000	P2	0	0	0	0	0
H1	S. yapa	2000	P2	0	0	0	0	0
H1	S. yapa	2000	P2	0	0	0	0	0
H1	S. yapa	2000	P2	0	0	0	0	0
H1	S. yapa	2000	P2	0	0	0	0	0
H1	S. yapa	2000	P2	0	0	0	0	0
H1	S. yapa	2000	P1	0	0	0	0	0
H1	S. yapa	2000	P1	0	0	0	0	0
H1	S. yapa	2000	P2	0	0	0	0	0
H1	S. yapa	2000	P2	0	0	0	0	0
H1	S. yapa	2000	P2	0	0	0	0	0
H1	S. yapa	2000	P2	0	0	0	0	0
H1	S. yapa	2000	P2	0	0	0	0	0
H1	S. yapa	2000	P1	0	0	0	0	0
H1	S. yapa	2000	P1	0	0	0	0	0
H1	S. yapa	2000	P1	0	0	0	0	0
H1	S. yapa	2000	P1	0	0	0	0	0
H1	S. yapa	2000	P2	0	0	0	0	0
H1	S. yapa	2000	P2	0	0	0	0	0
H1	S. yapa	2000	P2	0	0	0	0	0
H1	S. yapa	2000	P2	0	0	0	0	0
H1	S. yapa	2000	P1	0	0	0	0	0
H1	S. yapa	2000	P2	0	0	0	0	0
H1	S. yapa	2000	P2	0	0	0	0	0
H1	S. yapa	2000	P2	0	0	0	0	0
H1	S. yapa	2000	P2	0	0	0	0	0
H1	S. yapa	2000	P2	0	0	0	0	0
H1	S. yapa	2000	P1	0	0	0	0	0
H1	S. yapa	2000	P2	0	0	0	0	0
H1	S. yapa	2000	P2	0	0	0	0	0
H1	S. yapa	2000	P2	0	0	0	0	0
H1	S. yapa	2000	P1	0	0	0	0	0
H1	S. yapa	2000	P2	0	0	0	0	0
H1	S. yapa	2000	P2	0	0	0	0	0
H1	S. yapa	2000	P2	0	0	0	0	0
H1	S. yapa	2000	P2	0	0	0	0	0
H1	S. yapa	2000	P1	0	0	0	0	0
H1	S. yapa	2000	P2	0	0	0	0	0
H1	S. yapa	2000	P1	0	0	0	0	0
H1	S. yapa	2000	P2	0	0	0	0	0
H1	S. yapa	2000	P2	0	0	0	0	0
H1	S. yapa	2000	P2	0	0	0	0	0
H1	S. yapa	2000	P1	0	0	0	0	0
H1	S. yapa	2000	P1	0	0	0	0	0
H1	S. yapa	2000	P1	0	0	0	0	0
H1	S. yapa	2000	P2	0	0	0	0	0
H1	S. yapa	2000	P1	0	0	0	0	0
H1	S. yapa	2000	P1	0	0	0	0	0
H1	S. yapa	2000	P1	0	0	0	0	0
H1	S. yapa	2000	P2	0	0	0	0	0
H1	S. yapa	2000	P1	0	0	0	0	0
H1	S. yapa	2000	P2	0	0	0	0	0
H1	S. yapa	2000	P2	0	0	0	0	0
H1	S. yapa	2000	P1	0	0	0	0	0
H1	S. yapa	2000	P2	0	0	0	0	0
H1	S. yapa	2000	P1	0	0	0	0	0
H1	S. yapa	2000	P2	0	0	0	0	0
H1	S. yapa	2000	P2	0	0	0	0	0
H1	S. yapa	2000	P2	0	0	0	0	0
H1	S. yapa	2000	P2	0	0	0	0	0
H1	S. yapa	2000	P2	0	0	0	0	0
H1	S. yapa	2000	P2	0	0	0	0	0
H1	S. yapa	2000	P2	0	0	0	0	0
H1	S. yapa	2000	P2	0	0	0	0	0
H1	S. yapa	2000	P1	0	0	0	0	0
H1	S. yapa	2000	P2	0	0	0	0	0
H1	S. yapa	2000	P1	0	0	0	0	0
H1	S. yapa	2000	P1	0	0	0	0	0
H1	S. yapa	2000	P1	0	0	0	0	0
H1	S. yapa	2000	P2	0	0	0	0	0
H1	S. yapa	2000	P1	0	0	0	0	0
H1	S. yapa	2000	P1	0	0	0	0	0
H1	S. yapa	2000	P2	0	0	0	0	0
H1	S. yapa	2000	P1	0	0	0	0	0
H1	S. yapa	2000	P1	0	0	0	0	0
H1	S. yapa	2000	P1	0	0	0	0	0
H1	S. yapa	2000	P1	0	0	0	0	0
H1	S. yapa	2000	P1	0	0	0	0	0
H1	S. yapa	2000	P1	0	0	0	0	0
H1	S. yapa	2000	P2	0	0	0	0	0
H1	S. yapa	2000	P2	0	0	0	0	0
H1	S. yapa	2000	P1	0	0	0	0	0
H1	S. yapa	2000	P2	0	0	0	0	0
H1	S. yapa	2000	P1	0	0	0	0	0
H1	S. yapa	2000	P2	0	0	0	0	0
H1	S. yapa	2000	P1	0	0	0	0	0
H1	S. yapa	2000	P2	0	0	0	0	0
H1	S. yapa	2000	P1	0	0	0	0	0
H1	S. yapa	2000	P2	0	0	0	0	0
H1	S. yapa	2000	P2	0	0	0	0	0
H1	S. yapa	2000	P2	0	0	0	0	0
H1	S. yapa	2000	P2	0	0	0	0	0
H1	S. yapa	2000	P1	0	0	0	0	0
H1	S. yapa	2000	P1	0	0	0	0	0
H1	S. yapa	2000	P2	0	0	0	0	0
H1	S. yapa	2000	P2	0	0	0	0	0
H1	S. yapa	2000	I1	I1	1	0	4	0
H1	S. yapa	2000	I1	I1	1	0	5	0
H1	S. yapa	2000	I1	I1	1	0	7	0
H1	S. yapa	2000	I1	I1	1	0	5	0
H1	S. yapa	2000	I2	I2	1	0	6	0
H1	S. yapa	2000	I1	I3	1	0	4	0
H1	S. yapa	2000	I1	I1	1	0	4	0
H1	S. yapa	2000	I1	I2	1	0	4	0
H1	S. yapa	2000	I1	I1	1	0	2	0
H1	S. yapa	2000	I1	I1	1	0	3	0
H1	S. yapa	2000	I1	I1	1	0	2	0
H1	S. yapa	2000	I1	0	0	0	0	0
H1	S. yapa	2000	I1	I1	1	0	5	0
H1	S. yapa	2000	I1	I1	1	0	2	0
H1	S. yapa	2000	I2	I2	1	0	3	0
H1	S. yapa	2000	I2	I2	1	0	5	0
H1	S. yapa	2000	I2	I2	1	0	7	0
H1	S. yapa	2000	I2	I2	1	0	9	0
H1	S. yapa	2000	I2	I3	1	0	6	0
H1	S. yapa	2000	I2	0	0	0	0	0
H1	S. yapa	2000	I2	I3	1	0	7	0
H1	S. yapa	2000	I2	I2	1	0	5	0
H1	S. yapa	2000	I2	I3	1	0	10	1
H1	S. yapa	2000	I2	I2	1	0	6	0
H1	S. yapa	2000	I1	I1	1	0	5	0
H1	S. yapa	2000	I2	I2	1	0	5	0
H1	S. yapa	2000	I2	I2	1	0	7	3
H1	S. yapa	2000	I2	I2	1	0	5	2
H1	S. yapa	2000	I2	I3	1	0	6	2
H1	S. yapa	2000	I2	I2	1	0	4	0
H1	S. yapa	2000	I3	I3	1	0	4	1
H1	S. yapa	2000	I3	I3	1	0	5	0
H1	S. yapa	2000	I2	I2	1	0	4	0
H1	S. yapa	2000	I2	0	0	0	0	0
H1	S. yapa	2000	I2	I2	1	0	11	0
H1	S. yapa	2000	I3	I3	1	0	4	1
H1	S. yapa	2000	I3	I3	1	0	6	5
H1	S. yapa	2000	I3	I3	1	0	6	5
H1	S. yapa	2000	I3	I3	1	0	6	5
H1	S. yapa	2000	I3	I3	1	0	5	2
H1	S. yapa	2000	I3	I3	1	0	7	4
H1	S. yapa	2000	I3	I3	1	0	4	0
H1	S. yapa	2000	I3	I3	1	0	5	2
H1	S. yapa	2000	I3	I3	1	0	6	1
H1	S. yapa	2000	I3	I3	1	0	6	0
H1	S. yapa	2000	I3	I3	1	0	6	0
H1	S. yapa	2000	I3	8	1	0	8	6
H1	S. yapa	2000	I3	I3	1	0	3	1
H1	S. yapa	2000	I3	I3	1	0	4	2
H1	S. yapa	2000	I3	I3	1	0	4	2
H1	S. yapa	2000	I3	I3	1	0	6	2
H1	S. yapa	2000	NA	12	1	0	7	3
H1	S. yapa	2000	I3	I3	1	0	7	0
H1	S. yapa	2000	I3	I3	1	0	6	1
H1	S. yapa	2000	I3	I3	1	0	5	1
H1	S. yapa	2000	I3	I3	1	0	3	0
H1	S. yapa	2000	P2	I2	1	0	6	0
H1	S. yapa	2000	P2	P2	1	0	3	0
H1	S. yapa	2000	P2	P2	1	0	4	0
H1	S. yapa	2000	I1	I1	1	0	5	0
H1	S. yapa	2000	P2	I1	1	0	4	0
H1	S. yapa	2000	P2	P2	1	0	3	0
H1	S. yapa	2000	P2	I1	1	0	4	0
H1	S. yapa	2000	P2	P2	1	0	2	0
H1	S. yapa	2000	I1	I1	1	0	5	0
H1	S. yapa	2000	P2	P2	1	0	3	0
H1	S. yapa	2000	P2	P2	1	0	2	0
H1	S. yapa	2000	P2	P2	1	0	2	0
H1	S. yapa	2000	P2	I1	1	0	5	0
H1	S. yapa	2000	P2	P2	1	0	5	0
H1	S. yapa	2000	P2	I2	1	0	4	0
H1	S. yapa	2000	P2	P2	1	0	6	0
H1	S. yapa	2000	P2	I1	1	0	3	0
H1	S. yapa	2000	P2	I1	1	0	2	0
H1	S. yapa	2000	P2	0	0	0	0	0
H1	S. yapa	2000	P2	P2	1	0	2	0
H1	S. yapa	2000	P2	P2	1	0	3	0
H1	S. yapa	2000	P2	P2	1	0	4	0
H1	S. yapa	2000	P2	P2	1	0	4	0
H1	S. yapa	2000	P2	P2	1	0	4	0
H1	S. yapa	2000	P2	P2	1	0	4	0
H1	S. yapa	2000	I1	0	0	0	0	0
H1	S. yapa	2000	4	3	1	0	6	4
H1	S. yapa	2000	13	10	1	0	4	6
H1	S. yapa	2000	13	10	1	0	9	7
H1	S. yapa	2000	41	48	1	0	8	6
H1	S. yapa	2000	49	61	1	0	10	8
H1	S. yapa	2000	63	62	1	0	9	7
H1	S. yapa	2000	71	82	1	0	7	6
H1	S. yapa	2000	78	90	1	0	7	6
H1	S. yapa	2000	87	91	1	0	6	4
H1	S. yapa	2000	91	95	1	0	8	6
H1	S. yapa	2000	108	114	1	0	5	NA
H1	S. yapa	2000	127	136	1	0	9	7
H1	S. yapa	2000	164	165	1	0	9	7
H1	S. yapa	2000	168	187	1	0	11	4
H1	S. yapa	2000	179	202	1	0	10	8
H1	S. yapa	2000	184	186	1	0	8	5
H1	S. yapa	2000	190	195	1	0	9	6
H1	S. yapa	2000	243	249	1	0	5	NA
H1	S. yapa	2000	246	284	1	0	15	12
H1	S. yapa	2000	400	397	1	NA	6	0
H1	S. yapa	2000	412	404	1	NA	4	0
H1	S. yapa	2000	436	422	1	NA	3	0
H1	S. yapa	2000	461	461	1	0	10	0
H1	S. yapa	2000	512	470	1	4939.91	10	0
H1	S. yapa	2000	525	508	1	0	4	0
H1	S. yapa	2000	595	580	1	2048.37	3	0
H1	S. yapa	2000	621	630	1	5427.79	14	0
H1	S. yapa	2000	715	712	1	0	15	0
H2	S. mexicana	1998	I1	0	0	0	NA	0
H2	S. mexicana	1998	I1	I1	1	0	5	0
H2	S. mexicana	1998	I1	I1	1	0	5	0
H2	S. mexicana	1998	I1	0	0	0	NA	0
H2	S. mexicana	1998	I1	I2	1	0	5	0
H2	S. mexicana	1998	I1	I2	1	0	7	0
H2	S. mexicana	1998	I1	I2	1	0	4	0
H2	S. mexicana	1998	I1	I2	1	0	4	0
H2	S. mexicana	1998	I1	I2	1	0	5	0
H2	S. mexicana	1998	I1	I2	1	0	8	0
H2	S. mexicana	1998	I1	I2	1	0	6	0
H2	S. mexicana	1998	I1	I2	1	0	7	0
H2	S. mexicana	1998	I1	I2	1	0	6	0
H2	S. mexicana	1998	I1	I3	1	0	8	0
H2	S. mexicana	1998	I2	I2	1	0	1	0
H2	S. mexicana	1998	I2	I2	1	0	1	0
H2	S. mexicana	1998	I2	I2	1	0	1	0
H2	S. mexicana	1998	I2	0	0	0	0	0
H2	S. mexicana	1998	I2	I2	1	0	1	0
H2	S. mexicana	1998	I2	I2	1	0	1	0
H2	S. mexicana	1998	I2	I2	1	0	1	0
H2	S. mexicana	1998	I2	I2	1	0	1	0
H2	S. mexicana	1998	I2	I2	1	0	1	0
H2	S. mexicana	1998	I2	I2	1	0	1	0
H2	S. mexicana	1998	I2	I2	1	0	1	0
H2	S. mexicana	1998	I2	I2	1	0	2	0
H2	S. mexicana	1998	I2	I2	1	0	3	0
H2	S. mexicana	1998	I2	I2	1	0	1	0
H2	S. mexicana	1998	I2	I2	1	0	1	0
H2	S. mexicana	1998	I3	I3	1	0	8	1
H2	S. mexicana	1998	I3	13	1	0	8	0
H2	S. mexicana	1998	I3	13	1	0	5	1
H2	S. mexicana	1998	I3	I3	1	0	5	0
H2	S. mexicana	1998	I3	I3	1	0	5	0
H2	S. mexicana	1998	I3	I3	1	0	7	0
H2	S. mexicana	1998	I3	I3	1	0	6	2
H2	S. mexicana	1998	I3	I3	1	0	7	0
H2	S. mexicana	1998	I3	I3	1	0	7	0
H2	S. mexicana	1998	I3	I3	1	0	9	0
H2	S. mexicana	1998	NA	122	1	0	5	3
H2	S. mexicana	1998	P1	P2	1	0	4	0
H2	S. mexicana	1998	P1	0	0	0	NA	0
H2	S. mexicana	1998	P1	0	0	0	NA	0
H2	S. mexicana	1998	P1	0	0	0	NA	0
H2	S. mexicana	1998	P1	0	0	0	NA	0
H2	S. mexicana	1998	P1	0	0	0	NA	0
H2	S. mexicana	1998	P1	0	0	0	NA	0
H2	S. mexicana	1998	P1	0	0	0	NA	0
H2	S. mexicana	1998	P1	0	0	0	NA	0
H2	S. mexicana	1998	P1	0	0	0	NA	0
H2	S. mexicana	1998	P1	0	0	0	NA	0
H2	S. mexicana	1998	P1	0	0	0	NA	0
H2	S. mexicana	1998	P1	0	0	0	NA	0
H2	S. mexicana	1998	P1	0	0	0	NA	0
H2	S. mexicana	1998	P1	0	0	0	NA	0
H2	S. mexicana	1998	P1	0	0	0	NA	0
H2	S. mexicana	1998	P1	0	0	0	NA	0
H2	S. mexicana	1998	P1	0	0	0	NA	0
H2	S. mexicana	1998	P1	0	0	0	NA	0
H2	S. mexicana	1998	P1	0	0	0	NA	0
H2	S. mexicana	1998	P1	0	0	0	NA	0
H2	S. mexicana	1998	P1	0	0	0	NA	0
H2	S. mexicana	1998	P1	0	0	0	NA	0
H2	S. mexicana	1998	P1	0	0	0	NA	0
H2	S. mexicana	1998	P2	0	0	0	NA	0
H2	S. mexicana	1998	P2	0	0	0	NA	0
H2	S. mexicana	1998	P2	0	0	0	NA	0
H2	S. mexicana	1998	P2	0	0	0	NA	0
H2	S. mexicana	1998	P2	P2	1	0	5	0
H2	S. mexicana	1998	P2	0	0	0	NA	0
H2	S. mexicana	1998	P2	0	0	0	NA	0
H2	S. mexicana	1998	P2	0	0	0	NA	0
H2	S. mexicana	1998	P2	0	0	0	NA	0
H2	S. mexicana	1998	P2	0	0	0	NA	0
H2	S. mexicana	1998	P2	0	0	0	NA	0
H2	S. mexicana	1998	P2	0	0	0	NA	0
H2	S. mexicana	1998	P2	0	0	0	NA	0
H2	S. mexicana	1998	P2	0	0	0	NA	0
H2	S. mexicana	1998	P2	0	0	0	NA	0
H2	S. mexicana	1998	P2	I1	1	0	4	0
H2	S. mexicana	1998	P2	0	0	0	NA	0
H2	S. mexicana	1998	P2	0	0	0	NA	0
H2	S. mexicana	1998	P2	0	0	0	NA	0
H2	S. mexicana	1998	P2	I1	1	0	6	0
H2	S. mexicana	1998	P2	0	0	0	NA	0
H2	S. mexicana	1998	P2	0	0	0	NA	0
H2	S. mexicana	1998	P2	0	0	0	NA	0
H2	S. mexicana	1998	P2	0	0	0	NA	0
H2	S. mexicana	1998	P2	0	0	0	NA	0
H2	S. mexicana	1998	P2	0	0	0	NA	0
H2	S. mexicana	1998	P2	0	0	0	NA	0
H2	S. mexicana	1998	P2	0	0	0	NA	0
H2	S. mexicana	1998	P2	0	0	0	NA	0
H2	S. mexicana	1998	P2	0	0	0	NA	0
H2	S. mexicana	1998	P2	0	0	0	NA	0
H2	S. mexicana	1998	P2	0	0	0	NA	0
H2	S. mexicana	1998	P2	0	0	0	NA	0
H2	S. mexicana	1998	P2	0	0	0	NA	0
H2	S. mexicana	1998	P2	0	0	0	NA	0
H2	S. mexicana	1998	P2	0	0	0	NA	0
H2	S. mexicana	1998	P2	0	0	0	NA	0
H2	S. mexicana	1998	P2	0	0	0	NA	0
H2	S. mexicana	1998	P2	0	0	0	NA	0
H2	S. mexicana	1998	P2	0	0	0	NA	0
H2	S. mexicana	1998	P2	0	0	0	NA	0
H2	S. mexicana	1998	P2	0	0	0	NA	0
H2	S. mexicana	1998	P2	0	0	0	NA	0
H2	S. mexicana	1998	P2	0	0	0	NA	0
H2	S. mexicana	1998	P2	0	0	0	NA	0
H2	S. mexicana	1998	P2	0	0	0	NA	0
H2	S. mexicana	1998	P2	0	0	0	NA	0
H2	S. mexicana	1998	P2	0	0	0	NA	0
H2	S. mexicana	1998	13	20	1	0	7	2
H2	S. mexicana	1998	16	22	1	0	9	3
H2	S. mexicana	1998	17	32	1	0	9	2
H2	S. mexicana	1998	18	33	1	0	9	2
H2	S. mexicana	1998	23	0	0	0	3	0
H2	S. mexicana	1998	24	33	1	0	9	1
H2	S. mexicana	1998	25	33	1	0	8	0
H2	S. mexicana	1998	25	27	1	0	6	0
H2	S. mexicana	1998	28	41	1	0	8	0
H2	S. mexicana	1998	32	49	1	0	8	2
H2	S. mexicana	1998	37	41	1	0	9	2
H2	S. mexicana	1998	39	52	1	0	11	4
H2	S. mexicana	1998	40	50	1	0	12	4
H2	S. mexicana	1998	42	51	1	0	10	1
H2	S. mexicana	1998	43	48	1	0	4	1
H2	S. mexicana	1998	45	53	1	0	10	3
H2	S. mexicana	1998	47	52	1	0	6	2
H2	S. mexicana	1998	47	47	1	0	6	1
H2	S. mexicana	1998	48	57	1	0	9	4
H2	S. mexicana	1998	49	55	1	0	9	2
H2	S. mexicana	1998	50	56	1	0	6	2
H2	S. mexicana	1998	52	67	1	0	4	3
H2	S. mexicana	1998	52	89	1	0	9	2
H2	S. mexicana	1998	53	62	1	0	9	2
H2	S. mexicana	1998	53	70	1	0	5	2
H2	S. mexicana	1998	54	67	1	0	6	3
H2	S. mexicana	1998	54	52	1	0	6	3
H2	S. mexicana	1998	62	74	1	0	9	2
H2	S. mexicana	1998	62	62	1	0	9	1
H2	S. mexicana	1998	62	59	1	0	8	6
H2	S. mexicana	1998	65	80	1	0	9	2
H2	S. mexicana	1998	65	70	1	0	4	0
H2	S. mexicana	1998	66	89	1	0	16	5
H2	S. mexicana	1998	67	76	1	0	8	3
H2	S. mexicana	1998	69	81	1	0	9	1
H2	S. mexicana	1998	72	97	1	0	10	1
H2	S. mexicana	1998	74	75	1	0	5	3
H2	S. mexicana	1998	76	101	1	0	12	0
H2	S. mexicana	1998	77	69	1	0	5	0
H2	S. mexicana	1998	80	0	0	0	4	0
H2	S. mexicana	1998	80	98	1	0	6	3
H2	S. mexicana	1998	87	104	1	0	14	3
H2	S. mexicana	1998	89	122	1	0	9	3
H2	S. mexicana	1998	92	100	1	0	5	1
H2	S. mexicana	1998	92	110	1	0	11	5
H2	S. mexicana	1998	97	109	1	0	9	2
H2	S. mexicana	1998	100	116	1	0	8	3
H2	S. mexicana	1998	103	120	1	0	9	0
H2	S. mexicana	1998	104	122	1	0	9	3
H2	S. mexicana	1998	106	0	0	0	3	0
H2	S. mexicana	1998	115	120	1	0	8	2
H2	S. mexicana	1998	126	126	1	0	8	0
H2	S. mexicana	1998	127	140	1	0	10	4
H2	S. mexicana	1998	128	0	0	0	3	0
H2	S. mexicana	1998	136	152	1	0	10	6
H2	S. mexicana	1998	136	155	1	0	21	8
H2	S. mexicana	1998	137	160	1	0	8	4
H2	S. mexicana	1998	138	154	1	0	15	7
H2	S. mexicana	1998	140	165	1	0	12	6
H2	S. mexicana	1998	141	154	1	0	6	2
H2	S. mexicana	1998	168	0	0	0	8	0
H2	S. mexicana	1998	171	180	1	0	6	5
H2	S. mexicana	1998	173	180	1	0	6	1
H2	S. mexicana	1998	188	208	1	0	16	3
H2	S. mexicana	1998	192	0	0	0	2	0
H2	S. mexicana	1998	200	213	1	0	3	0
H2	S. mexicana	1998	201	220	1	0	9	6
H2	S. mexicana	1998	210	228	1	0	4	0
H2	S. mexicana	1998	216	224	1	0	19	7
H2	S. mexicana	1998	249	283	1	0	9	NA
H2	S. mexicana	1998	254	378	1	0	2	NA
H2	S. mexicana	1998	344	369	1	2222.43	7	0
H2	S. mexicana	1998	351	361	1	405.783	16	0
H2	S. mexicana	1998	390	449	1	3777.6	15	11
H2	S. mexicana	1998	470	500	1	6806.47	10	0
H2	S. mexicana	1998	490	493	1	1586.26	7	0
H2	S. mexicana	1998	531	543	1	10891.5	9	0
H2	S. mexicana	1998	563	565	1	0	17	0
H2	S. mexicana	1998	582	625	1	7610.82	20	0
H2	S. mexicana	1998	583	607	1	2015.27	14	0
H2	S. mexicana	1998	583	612	1	2018.97	17	0
H2	S. mexicana	1998	808	812	1	1807.27	16	0
H2	S. mexicana	1998	963	992	1	3278.22	16	0
H2	S. mexicana	1998	972	947	1	609.587	16	0
H2	S. mexicana	1999	P2	0	0	0	0	0
H2	S. mexicana	1999	P2	0	0	0	0	0
H2	S. mexicana	1999	P2	0	0	0	0	0
H2	S. mexicana	1999	P2	0	0	0	0	0
H2	S. mexicana	1999	P2	0	0	0	0	0
H2	S. mexicana	1999	P2	0	0	0	0	0
H2	S. mexicana	1999	P2	0	0	0	0	0
H2	S. mexicana	1999	P2	0	0	0	0	0
H2	S. mexicana	1999	P1	0	0	0	0	0
H2	S. mexicana	1999	P1	0	0	0	0	0
H2	S. mexicana	1999	P1	0	0	0	0	0
H2	S. mexicana	1999	P2	0	0	0	0	0
H2	S. mexicana	1999	P2	0	0	0	0	0
H2	S. mexicana	1999	P1	0	0	0	0	0
H2	S. mexicana	1999	P2	0	0	0	0	0
H2	S. mexicana	1999	P2	0	0	0	0	0
H2	S. mexicana	1999	P2	0	0	0	0	0
H2	S. mexicana	1999	P2	0	0	0	0	0
H2	S. mexicana	1999	P2	P2	1	0	6	0
H2	S. mexicana	1999	P2	0	0	0	0	0
H2	S. mexicana	1999	P2	0	0	0	0	0
H2	S. mexicana	1999	P2	0	0	0	0	0
H2	S. mexicana	1999	P2	0	0	0	0	0
H2	S. mexicana	1999	P2	0	0	0	0	0
H2	S. mexicana	1999	P2	P2	1	0	2	0
H2	S. mexicana	1999	P2	0	0	0	0	0
H2	S. mexicana	1999	P2	0	0	0	0	0
H2	S. mexicana	1999	P1	0	0	0	0	0
H2	S. mexicana	1999	P1	0	0	0	0	0
H2	S. mexicana	1999	P1	0	0	0	0	0
H2	S. mexicana	1999	P2	0	0	0	0	0
H2	S. mexicana	1999	P2	0	0	0	0	0
H2	S. mexicana	1999	P1	0	0	0	0	0
H2	S. mexicana	1999	P1	0	0	0	0	0
H2	S. mexicana	1999	P2	0	0	0	0	0
H2	S. mexicana	1999	P2	0	0	0	0	0
H2	S. mexicana	1999	P2	0	0	0	0	0
H2	S. mexicana	1999	P1	0	0	0	0	0
H2	S. mexicana	1999	P2	0	0	0	0	0
H2	S. mexicana	1999	P1	0	0	0	0	0
H2	S. mexicana	1999	P1	0	0	0	0	0
H2	S. mexicana	1999	I1	0	0	0	0	0
H2	S. mexicana	1999	I1	0	0	0	0	0
H2	S. mexicana	1999	I2	0	0	0	0	0
H2	S. mexicana	1999	I2	I3	1	0	7	0
H2	S. mexicana	1999	I2	I2	1	0	5	0
H2	S. mexicana	1999	I2	I2	1	0	7	0
H2	S. mexicana	1999	I2	I3	1	0	9	0
H2	S. mexicana	1999	I2	I2	1	0	9	0
H2	S. mexicana	1999	I2	I2	1	0	7	0
H2	S. mexicana	1999	I2	I2	1	0	4	0
H2	S. mexicana	1999	I2	I2	1	0	5	0
H2	S. mexicana	1999	I3	I3	1	0	7	0
H2	S. mexicana	1999	I2	0	0	0	0	0
H2	S. mexicana	1999	I2	I2	1	0	3	0
H2	S. mexicana	1999	I2	I2	1	0	5	1
H2	S. mexicana	1999	I2	I2	1	0	4	1
H2	S. mexicana	1999	I2	I3	1	0	4	0
H2	S. mexicana	1999	I2	I2	1	0	4	0
H2	S. mexicana	1999	I2	I3	1	0	4	0
H2	S. mexicana	1999	I2	I2	1	0	3	0
H2	S. mexicana	1999	I2	I3	1	0	5	0
H2	S. mexicana	1999	I2	I2	1	0	4	0
H2	S. mexicana	1999	I2	I2	1	0	5	0
H2	S. mexicana	1999	I2	I2	1	0	5	0
H2	S. mexicana	1999	I2	I2	1	0	3	0
H2	S. mexicana	1999	I2	I3	1	0	5	0
H2	S. mexicana	1999	I3	9	1	0	7	2
H2	S. mexicana	1999	I3	I3	1	0	NA	0
H2	S. mexicana	1999	I3	I3	1	0	2	0
H2	S. mexicana	1999	I3	I3	1	0	3	0
H2	S. mexicana	1999	I3	I3	1	0	3	0
H2	S. mexicana	1999	I3	I3	1	0	5	0
H2	S. mexicana	1999	I3	I3	1	0	5	0
H2	S. mexicana	1999	I3	I3	1	0	4	0
H2	S. mexicana	1999	P2	P2	1	0	5	0
H2	S. mexicana	1999	P2	P2	1	0	5	0
H2	S. mexicana	1999	I1	0	0	0	NA	0
H2	S. mexicana	1999	I1	I1	1	0	7	0
H2	S. mexicana	1999	13	13	1	0	4	0
H2	S. mexicana	1999	13	9	1	0	5	0
H2	S. mexicana	1999	20	37	1	0	9	5
H2	S. mexicana	1999	22	32	1	0	10	6
H2	S. mexicana	1999	27	0	0	0	3	0
H2	S. mexicana	1999	32	24	1	0	7	0
H2	S. mexicana	1999	33	33	1	0	8	0
H2	S. mexicana	1999	33	38	1	0	9	0
H2	S. mexicana	1999	33	36	1	0	11	5
H2	S. mexicana	1999	41	47	1	0	7	1
H2	S. mexicana	1999	41	42	1	0	7	0
H2	S. mexicana	1999	47	61	1	0	9	4
H2	S. mexicana	1999	48	49	1	0	8	2
H2	S. mexicana	1999	49	46	1	0	8	3
H2	S. mexicana	1999	50	56	1	0	11	4
H2	S. mexicana	1999	51	53	1	0	9	0
H2	S. mexicana	1999	52	52	1	0	7	0
H2	S. mexicana	1999	52	52	1	0	10	4
H2	S. mexicana	1999	52	82	1	0	9	3
H2	S. mexicana	1999	53	51	1	0	8	0
H2	S. mexicana	1999	55	51	1	0	7	0
H2	S. mexicana	1999	56	52	1	0	9	1
H2	S. mexicana	1999	57	61	1	0	9	2
H2	S. mexicana	1999	59	69	1	0	6	2
H2	S. mexicana	1999	62	72	1	0	8	0
H2	S. mexicana	1999	62	0	0	0	2	0
H2	S. mexicana	1999	67	51	1	0	6	2
H2	S. mexicana	1999	67	84	1	0	6	3
H2	S. mexicana	1999	69	0	0	0	2	0
H2	S. mexicana	1999	70	76	1	0	8	0
H2	S. mexicana	1999	70	70	1	0	6	1
H2	S. mexicana	1999	74	80	1	0	11	7
H2	S. mexicana	1999	75	81	1	0	6	2
H2	S. mexicana	1999	76	84	1	0	9	3
H2	S. mexicana	1999	80	84	1	0	9	0
H2	S. mexicana	1999	81	81	1	0	7	1
H2	S. mexicana	1999	89	92	1	0	7	0
H2	S. mexicana	1999	89	102	1	0	8	2
H2	S. mexicana	1999	97	101	1	0	10	3
H2	S. mexicana	1999	98	108	1	0	9	4
H2	S. mexicana	1999	100	102	1	0	7	0
H2	S. mexicana	1999	101	106	1	0	11	3
H2	S. mexicana	1999	104	107	1	0	13	4
H2	S. mexicana	1999	109	104	1	0	7	0
H2	S. mexicana	1999	110	117	1	0	7	3
H2	S. mexicana	1999	116	119	1	0	9	4
H2	S. mexicana	1999	120	120	1	0	9	4
H2	S. mexicana	1999	120	124	1	0	8	1
H2	S. mexicana	1999	122	130	1	0	8	2
H2	S. mexicana	1999	122	127	1	0	8	2
H2	S. mexicana	1999	122	119	1	0	10	5
H2	S. mexicana	1999	126	124	1	0	9	0
H2	S. mexicana	1999	140	145	1	0	9	1
H2	S. mexicana	1999	152	160	1	0	10	3
H2	S. mexicana	1999	154	160	1	0	6	1
H2	S. mexicana	1999	154	188	1	0	13	5
H2	S. mexicana	1999	155	195	1	0	12	1
H2	S. mexicana	1999	160	172	1	0	14	5
H2	S. mexicana	1999	165	0	0	0	3	0
H2	S. mexicana	1999	180	185	1	0	11	3
H2	S. mexicana	1999	180	0	0	0	2	0
H2	S. mexicana	1999	208	222	1	0	20	10
H2	S. mexicana	1999	213	0	0	0	2	0
H2	S. mexicana	1999	220	0	0	0	NA	NA
H2	S. mexicana	1999	224	274	1	0	26	16
H2	S. mexicana	1999	228	0	0	0	NA	NA
H2	S. mexicana	1999	247	247	1	0	15	10
H2	S. mexicana	1999	283	300	1	0	11	NA
H2	S. mexicana	1999	361	0	0	0	NA	NA
H2	S. mexicana	1999	369	378	1	2222.43	8	0
H2	S. mexicana	1999	378	315	1	0	7	NA
H2	S. mexicana	1999	449	466	1	3777.6	7	0
H2	S. mexicana	1999	493	503	1	1586.26	8	0
H2	S. mexicana	1999	500	525	1	6806.47	7	0
H2	S. mexicana	1999	543	545	1	10891.5	19	0
H2	S. mexicana	1999	565	606	1	0	17	0
H2	S. mexicana	1999	607	633	1	2015.27	8	0
H2	S. mexicana	1999	612	631	1	2018.97	23	0
H2	S. mexicana	1999	625	638	1	7610.82	18	0
H2	S. mexicana	1999	812	946	1	1807.27	15	0
H2	S. mexicana	1999	947	1028	1	609.587	18	0
H2	S. mexicana	1999	992	982	1	3278.22	23	0
H2	S. mexicana	2000	P2	0	0	0	0	0
H2	S. mexicana	2000	P2	0	0	0	0	0
H2	S. mexicana	2000	P2	0	0	0	0	0
H2	S. mexicana	2000	P2	0	0	0	0	0
H2	S. mexicana	2000	P2	0	0	0	0	0
H2	S. mexicana	2000	P2	0	0	0	0	0
H2	S. mexicana	2000	P2	0	0	0	0	0
H2	S. mexicana	2000	P2	0	0	0	0	0
H2	S. mexicana	2000	P2	0	0	0	0	0
H2	S. mexicana	2000	P2	0	0	0	0	0
H2	S. mexicana	2000	P2	0	0	0	0	0
H2	S. mexicana	2000	P2	0	0	0	0	0
H2	S. mexicana	2000	P1	0	0	0	0	0
H2	S. mexicana	2000	P2	0	0	0	0	0
H2	S. mexicana	2000	P1	P2	1	0	2	0
H2	S. mexicana	2000	P2	P2	1	0	2	0
H2	S. mexicana	2000	P1	P2	1	0	2	0
H2	S. mexicana	2000	P1	0	0	0	0	0
H2	S. mexicana	2000	P1	0	0	0	0	0
H2	S. mexicana	2000	P1	0	0	0	0	0
H2	S. mexicana	2000	P2	0	0	0	0	0
H2	S. mexicana	2000	P2	0	0	0	0	0
H2	S. mexicana	2000	P2	0	0	0	0	0
H2	S. mexicana	2000	P2	0	0	0	0	0
H2	S. mexicana	2000	P1	0	0	0	0	0
H2	S. mexicana	2000	P1	0	0	0	0	0
H2	S. mexicana	2000	I3	I3	1	0	9	0
H2	S. mexicana	2000	I2	I3	1	0	8	0
H2	S. mexicana	2000	I2	I3	1	0	6	0
H2	S. mexicana	2000	I3	I3	1	0	6	0
H2	S. mexicana	2000	I2	0	0	0	NA	0
H2	S. mexicana	2000	I2	0	0	0	NA	0
H2	S. mexicana	2000	I2	0	0	0	NA	0
H2	S. mexicana	2000	I2	0	0	0	NA	0
H2	S. mexicana	2000	I2	I2	1	0	7	0
H2	S. mexicana	2000	I3	I3	1	0	7	4
H2	S. mexicana	2000	I2	I3	1	0	4	0
H2	S. mexicana	2000	I2	I3	1	0	3	0
H2	S. mexicana	2000	I2	I3	1	0	5	0
H2	S. mexicana	2000	I3	I3	1	0	6	0
H2	S. mexicana	2000	I2	I3	1	0	5	0
H2	S. mexicana	2000	I3	I3	1	0	4	0
H2	S. mexicana	2000	I2	I3	1	0	4	0
H2	S. mexicana	2000	I3	I3	1	0	5	0
H2	S. mexicana	2000	I2	I3	1	0	2	0
H2	S. mexicana	2000	I2	I3	1	0	6	0
H2	S. mexicana	2000	I2	I3	1	0	4	0
H2	S. mexicana	2000	I2	I3	1	0	5	0
H2	S. mexicana	2000	I3	I3	1	0	6	0
H2	S. mexicana	2000	I3	9	1	0	5	0
H2	S. mexicana	2000	I3	5	1	0	3	0
H2	S. mexicana	2000	I3	I3	1	0	4	0
H2	S. mexicana	2000	I3	I3	1	0	4	0
H2	S. mexicana	2000	I3	14	1	0	12	6
H2	S. mexicana	2000	I3	I3	1	0	7	5
H2	S. mexicana	2000	I3	I3	1	0	6	1
H2	S. mexicana	2000	P2	0	0	0	NA	0
H2	S. mexicana	2000	P2	I1	1	0	3	0
H2	S. mexicana	2000	I1	I1	1	0	3	0
H2	S. mexicana	2000	9	14	1	0	6	4
H2	S. mexicana	2000	9	10	1	0	7	4
H2	S. mexicana	2000	13	18	1	0	8	3
H2	S. mexicana	2000	24	24	1	0	9	3
H2	S. mexicana	2000	32	33	1	0	4	2
H2	S. mexicana	2000	33	37	1	0	4	0
H2	S. mexicana	2000	36	50	1	0	6	4
H2	S. mexicana	2000	37	33	1	0	6	4
H2	S. mexicana	2000	38	33	1	0	8	5
H2	S. mexicana	2000	42	44	1	0	9	9
H2	S. mexicana	2000	46	56	1	0	4	2
H2	S. mexicana	2000	47	40	1	0	6	2
H2	S. mexicana	2000	49	52	1	0	9	7
H2	S. mexicana	2000	51	44	1	0	8	5
H2	S. mexicana	2000	51	44	1	0	10	6
H2	S. mexicana	2000	51	57	1	0	7	3
H2	S. mexicana	2000	52	59	1	0	8	7
H2	S. mexicana	2000	52	62	1	0	10	9
H2	S. mexicana	2000	52	60	1	0	5	4
H2	S. mexicana	2000	53	60	1	0	9	5
H2	S. mexicana	2000	56	50	1	0	5	1
H2	S. mexicana	2000	61	62	1	0	9	7
H2	S. mexicana	2000	61	70	1	0	7	5
H2	S. mexicana	2000	69	67	1	0	8	4
H2	S. mexicana	2000	70	55	1	0	8	6
H2	S. mexicana	2000	72	70	1	0	10	7
H2	S. mexicana	2000	76	76	1	0	5	0
H2	S. mexicana	2000	80	80	1	0	6	4
H2	S. mexicana	2000	81	84	1	0	7	2
H2	S. mexicana	2000	81	82	1	0	7	3
H2	S. mexicana	2000	82	76	1	0	13	10
H2	S. mexicana	2000	84	80	1	0	11	6
H2	S. mexicana	2000	84	82	1	0	6	3
H2	S. mexicana	2000	84	90	1	0	9	7
H2	S. mexicana	2000	92	76	1	0	10	4
H2	S. mexicana	2000	101	120	1	0	7	3
H2	S. mexicana	2000	102	103	1	0	10	6
H2	S. mexicana	2000	102	91	1	0	6	2
H2	S. mexicana	2000	104	106	1	0	10	9
H2	S. mexicana	2000	106	110	1	0	10	4
H2	S. mexicana	2000	107	108	1	0	11	6
H2	S. mexicana	2000	108	114	1	0	9	5
H2	S. mexicana	2000	117	115	1	0	8	3
H2	S. mexicana	2000	119	0	0	0	0	0
H2	S. mexicana	2000	119	127	1	0	6	3
H2	S. mexicana	2000	120	120	1	0	7	4
H2	S. mexicana	2000	124	125	1	0	8	4
H2	S. mexicana	2000	124	123	1	0	8	7
H2	S. mexicana	2000	127	125	1	0	7	3
H2	S. mexicana	2000	130	108	1	0	7	4
H2	S. mexicana	2000	145	155	1	0	12	5
H2	S. mexicana	2000	160	160	1	0	7	6
H2	S. mexicana	2000	160	155	1	0	4	4
H2	S. mexicana	2000	172	180	1	0	6	6
H2	S. mexicana	2000	185	193	1	0	4	4
H2	S. mexicana	2000	188	196	1	0	16	14
H2	S. mexicana	2000	195	200	1	0	14	5
H2	S. mexicana	2000	222	235	1	0	11	5
H2	S. mexicana	2000	247	274	1	0	13	4
H2	S. mexicana	2000	274	283	1	0	13	5
H2	S. mexicana	2000	290	322	1	0	7	NA
H2	S. mexicana	2000	300	320	1	0	22	13
H2	S. mexicana	2000	315	329	1	0	11	NA
H2	S. mexicana	2000	378	406	1	4107.74	11	0
H2	S. mexicana	2000	466	430	1	0	7	0
H2	S. mexicana	2000	503	483	1	2805.38	11	7
H2	S. mexicana	2000	525	498	1	2080.94	9	0
H2	S. mexicana	2000	545	529	1	3300.14	8	0
H2	S. mexicana	2000	606	574	1	0	8	0
H2	S. mexicana	2000	631	609	1	9011.22	14	0
H2	S. mexicana	2000	633	596	1	7181.45	10	0
H2	S. mexicana	2000	638	643	1	10838.2	12	0
H2	S. mexicana	2000	946	946	1	3448.24	9	0
H2	S. mexicana	2000	982	982	1	3391.75	16	0
H2	S. mexicana	2000	1028	1028	1	4586.66	8	0
H2	S. yapa	1998	I1	I1	1	0	4	0
H2	S. yapa	1998	I1	I1	1	0	5	0
H2	S. yapa	1998	I1	I1	1	0	4	0
H2	S. yapa	1998	I1	I1	1	0	4	0
H2	S. yapa	1998	I1	I1	1	0	4	0
H2	S. yapa	1998	I1	I1	1	0	3	0
H2	S. yapa	1998	I1	I2	1	0	5	0
H2	S. yapa	1998	I1	I2	1	0	4	0
H2	S. yapa	1998	I1	0	0	0	0	0
H2	S. yapa	1998	I1	I1	1	0	7	0
H2	S. yapa	1998	I1	I1	1	0	5	0
H2	S. yapa	1998	I1	0	0	0	0	0
H2	S. yapa	1998	I1	I2	1	0	3	0
H2	S. yapa	1998	I1	I1	1	0	3	0
H2	S. yapa	1998	I1	I1	1	0	4	0
H2	S. yapa	1998	I1	I2	1	0	6	0
H2	S. yapa	1998	I1	I1	1	0	5	0
H2	S. yapa	1998	I1	I2	1	0	8	0
H2	S. yapa	1998	I1	I2	1	0	3	0
H2	S. yapa	1998	I1	I1	1	0	7	0
H2	S. yapa	1998	I1	I2	1	0	8	0
H2	S. yapa	1998	I1	I2	1	0	9	0
H2	S. yapa	1998	I2	I3	1	0	6	0
H2	S. yapa	1998	I2	I2	1	0	2	0
H2	S. yapa	1998	I2	I2	1	0	0	0
H2	S. yapa	1998	I2	I2	1	0	0	0
H2	S. yapa	1998	I2	I3	1	0	0	0
H2	S. yapa	1998	I2	I2	1	0	4	0
H2	S. yapa	1998	I2	I2	1	0	4	0
H2	S. yapa	1998	I2	0	0	0	0	0
H2	S. yapa	1998	I2	0	0	0	0	0
H2	S. yapa	1998	I2	0	0	0	0	0
H2	S. yapa	1998	I2	I3	1	0	5	0
H2	S. yapa	1998	I2	I2	1	0	4	0
H2	S. yapa	1998	I2	0	0	0	0	0
H2	S. yapa	1998	I2	I3	1	0	6	0
H2	S. yapa	1998	I2	I3	1	0	4	0
H2	S. yapa	1998	I2	I3	1	0	4	0
H2	S. yapa	1998	I2	I2	1	0	0	0
H2	S. yapa	1998	I2	I2	1	0	0	0
H2	S. yapa	1998	I2	I3	1	0	6	0
H2	S. yapa	1998	I2	I2	1	0	4	0
H2	S. yapa	1998	I3	I3	1	0	0	1
H2	S. yapa	1998	I3	I3	1	0	0	0
H2	S. yapa	1998	I3	I3	1	0	0	2
H2	S. yapa	1998	I3	I3	1	0	0	1
H2	S. yapa	1998	I3	I3	1	0	0	0
H2	S. yapa	1998	I3	I3	1	0	0	1
H2	S. yapa	1998	I3	I3	1	0	0	5
H2	S. yapa	1998	I3	I3	1	0	0	4
H2	S. yapa	1998	I3	I3	1	0	0	1
H2	S. yapa	1998	I3	I3	1	0	8	0
H2	S. yapa	1998	I3	I3	1	0	0	0
H2	S. yapa	1998	I3	0	0	0	0	0
H2	S. yapa	1998	I3	I3	1	0	0	1
H2	S. yapa	1998	I3	I3	1	0	0	0
H2	S. yapa	1998	I3	I3	1	0	0	0
H2	S. yapa	1998	I3	I3	1	0	0	4
H2	S. yapa	1998	I3	I3	1	0	0	1
H2	S. yapa	1998	I3	I3	1	0	0	0
H2	S. yapa	1998	I3	I3	1	0	0	0
H2	S. yapa	1998	I3	I3	1	0	0	0
H2	S. yapa	1998	I3	I3	1	0	0	0
H2	S. yapa	1998	P1	0	0	0	0	0
H2	S. yapa	1998	P1	P2	1	0	2	0
H2	S. yapa	1998	P1	0	0	0	0	0
H2	S. yapa	1998	P2	0	0	0	0	0
H2	S. yapa	1998	P2	0	0	0	0	0
H2	S. yapa	1998	P2	0	0	0	0	0
H2	S. yapa	1998	P2	0	0	0	0	0
H2	S. yapa	1998	P2	0	0	0	0	0
H2	S. yapa	1998	P2	P2	1	0	6	0
H2	S. yapa	1998	P2	P2	1	0	3	0
H2	S. yapa	1998	P2	P2	1	0	2	0
H2	S. yapa	1998	P2	P2	1	0	2	0
H2	S. yapa	1998	P2	P2	1	0	4	0
H2	S. yapa	1998	P2	P2	1	0	3	0
H2	S. yapa	1998	P2	I1	1	0	4	0
H2	S. yapa	1998	P2	P2	1	0	5	0
H2	S. yapa	1998	P2	P2	1	0	8	0
H2	S. yapa	1998	P2	P2	1	0	5	0
H2	S. yapa	1998	P2	0	0	0	0	0
H2	S. yapa	1998	P2	P2	1	0	7	0
H2	S. yapa	1998	P2	P2	1	0	7	0
H2	S. yapa	1998	P2	P2	1	0	7	0
H2	S. yapa	1998	P2	P2	1	0	5	0
H2	S. yapa	1998	P2	0	0	0	0	0
H2	S. yapa	1998	P2	P2	1	0	7	0
H2	S. yapa	1998	P2	0	0	0	0	0
H2	S. yapa	1998	P2	I1	1	0	7	0
H2	S. yapa	1998	P2	0	0	0	0	0
H2	S. yapa	1998	P2	0	0	0	0	0
H2	S. yapa	1998	P2	0	0	0	0	0
H2	S. yapa	1998	P2	0	0	0	0	0
H2	S. yapa	1998	P2	0	0	0	0	0
H2	S. yapa	1998	P2	P2	1	0	5	0
H2	S. yapa	1998	P2	0	0	0	0	0
H2	S. yapa	1998	P2	P2	1	0	6	0
H2	S. yapa	1998	P2	0	0	0	0	0
H2	S. yapa	1998	P2	P2	1	0	0	0
H2	S. yapa	1998	P2	0	0	0	0	0
H2	S. yapa	1998	P2	P2	1	0	6	0
H2	S. yapa	1998	P2	P2	1	0	2	0
H2	S. yapa	1998	P2	0	0	0	0	0
H2	S. yapa	1998	P2	P2	1	0	3	0
H2	S. yapa	1998	P2	0	0	0	0	0
H2	S. yapa	1998	P2	P2	1	0	2	0
H2	S. yapa	1998	P2	0	0	0	0	0
H2	S. yapa	1998	P2	P2	1	0	6	0
H2	S. yapa	1998	P2	P2	1	0	3	0
H2	S. yapa	1998	P2	P2	1	0	6	0
H2	S. yapa	1998	P2	0	0	0	0	0
H2	S. yapa	1998	P2	P2	1	0	5	0
H2	S. yapa	1998	P2	P2	1	0	5	0
H2	S. yapa	1998	P2	P2	1	0	7	0
H2	S. yapa	1998	P2	P2	1	0	5	0
H2	S. yapa	1998	P2	P2	1	0	6	0
H2	S. yapa	1998	P2	I1	1	0	6	0
H2	S. yapa	1998	P2	P2	1	0	3	0
H2	S. yapa	1998	P2	P2	1	0	3	0
H2	S. yapa	1998	P2	P2	1	0	3	0
H2	S. yapa	1998	10	10	1	0	5	1
H2	S. yapa	1998	10	8	1	0	8	3
H2	S. yapa	1998	11	10	1	0	8	0
H2	S. yapa	1998	12	20	1	0	9	2
H2	S. yapa	1998	13	32	1	0	8	2
H2	S. yapa	1998	19	23	1	0	6	0
H2	S. yapa	1998	20	NA	1	0	6	0
H2	S. yapa	1998	20	30	1	0	6	1
H2	S. yapa	1998	20	21	1	0	9	1
H2	S. yapa	1998	24	28	1	0	8	2
H2	S. yapa	1998	30	31.5	1	0	8	3
H2	S. yapa	1998	32	42	1	0	8	1
H2	S. yapa	1998	33	36	1	0	6	2
H2	S. yapa	1998	35	35	1	0	8	2
H2	S. yapa	1998	36	46	1	0	12	4
H2	S. yapa	1998	40	33	1	0	6	2
H2	S. yapa	1998	44	55	1	0	6	0
H2	S. yapa	1998	47	52	1	0	6	2
H2	S. yapa	1998	48	59	1	0	7	0
H2	S. yapa	1998	48	49	1	0	8	2
H2	S. yapa	1998	56	62	1	0	7	1
H2	S. yapa	1998	62	69	1	0	9	4
H2	S. yapa	1998	63	69	1	0	9	2
H2	S. yapa	1998	67	67	1	0	5	1
H2	S. yapa	1998	69	63	1	0	9	2
H2	S. yapa	1998	75	89	1	0	10	2
H2	S. yapa	1998	80	85	1	0	8	2
H2	S. yapa	1998	81	95	1	0	8	2
H2	S. yapa	1998	83	86	1	0	9	2
H2	S. yapa	1998	84	95	1	0	5	3
H2	S. yapa	1998	97	102	1	0	9	1
H2	S. yapa	1998	114	132	1	0	10	2
H2	S. yapa	1998	118	142	1	0	7	3
H2	S. yapa	1998	121	128	1	0	7	0
H2	S. yapa	1998	134	159	1	0	4	0
H2	S. yapa	1998	148	NA	1	0	1	0
H2	S. yapa	1998	176	0	0	0	6	0
H2	S. yapa	1998	177	190	1	0	7	3
H2	S. yapa	1998	196	203	1	0	8	2
H2	S. yapa	1998	229	252	1	0	12	0
H2	S. yapa	1998	254	260	1	0	7	NA
H2	S. yapa	1998	274	284	1	0	7	NA
H2	S. yapa	1998	296	321	1	0	3	NA
H2	S. yapa	1998	399	402	1	17675.9	12	0
H2	S. yapa	1998	432	464	1	8166.64	24	0
H2	S. yapa	1998	531	517	1	6185.77	18	0
H2	S. yapa	1999	P2	P2	1	0	5	0
H2	S. yapa	1999	P2	0	0	0	0	0
H2	S. yapa	1999	P2	0	0	0	0	0
H2	S. yapa	1999	P2	0	0	0	0	0
[truncated: 324 more rows]

## Sheet: leafproduction
Homegarden	Species	Year	Size or category at time t	Number of leaves harvested	Proportion of leaves harvested	Leaves produced
H1	S.mexicana	1998	6	0	0	3
H1	S.mexicana	1998	7	0	0	4
H1	S.mexicana	1998	10	0	0	2
H1	S.mexicana	1998	12	1	0.166667	4
H1	S.mexicana	1998	12	2	0.285714	4
H1	S.mexicana	1998	12	2	0.333333	3
H1	S.mexicana	1998	13	1	0.111111	5
H1	S.mexicana	1998	14	0	0	3
H1	S.mexicana	1998	14	1	0.166667	4
H1	S.mexicana	1998	15	0	0	4
H1	S.mexicana	1998	15	2	0.285714	4
H1	S.mexicana	1998	16	0	0	3
H1	S.mexicana	1998	20	0	0	3
H1	S.mexicana	1998	20	0	0	4
H1	S.mexicana	1998	24	0	0	2
H1	S.mexicana	1998	27	0	0	2
H1	S.mexicana	1998	28	1	0.2	3
H1	S.mexicana	1998	30	0	0	4
H1	S.mexicana	1998	30	0	0	3
H1	S.mexicana	1998	30	2	0.285714	3
H1	S.mexicana	1998	30	2	0.333333	2
H1	S.mexicana	1998	38	3	0.428571	4
H1	S.mexicana	1998	51	0	0	3
H1	S.mexicana	1998	52	1	0.166667	4
H1	S.mexicana	1998	52	1	0.166667	4
H1	S.mexicana	1998	52	3	0.5	4
H1	S.mexicana	1998	53	0	0	2
H1	S.mexicana	1998	55	0	0	3
H1	S.mexicana	1998	62	3	0.428571	5
H1	S.mexicana	1998	66	2	0.4	3
H1	S.mexicana	1998	69	0	0	4
H1	S.mexicana	1998	71	1	0.166667	4
H1	S.mexicana	1998	73	1	0.25	3
H1	S.mexicana	1998	75	2	0.4	4
H1	S.mexicana	1998	84	3	0.5	5
H1	S.mexicana	1998	91	1	0.142857	5
H1	S.mexicana	1998	137	1	0.2	4
H1	S.mexicana	1998	168	1	0.2	4
H1	S.mexicana	1998	174	1	0.2	4
H1	S.mexicana	1998	178	3	0.333333	5
H1	S.mexicana	1998	214	0	0	7
H1	S.mexicana	1998	256	3	0.214286	8
H1	S.mexicana	1998	259	3	0.375	3
H1	S.mexicana	1998	300	5	0.5	5
H1	S.mexicana	1998	325	0	0	6
H1	S.mexicana	1998	352	0	0	0
H1	S.mexicana	1998	378	0	0	5
H1	S.mexicana	1998	383	0	0	0
H1	S.mexicana	1998	391	0	0	0
H1	S.mexicana	1998	423	0	0	0
H1	S.mexicana	1998	549	0	0	10
H1	S.mexicana	1998	555	0	0	10
H1	S.mexicana	1998	570	0	0	9
H1	S.mexicana	1998	587	0	0	2
H1	S.mexicana	1998	781	0	0	0
H1	S.mexicana	1998	787	0	0	0
H1	S.mexicana	1998	788	0	0	10
H1	S.mexicana	1998	810	0	0	13
H1	S.mexicana	1998	815	0	0	7
H1	S.mexicana	1998	869	0	0	13
H1	S.mexicana	1998	872	0	0	1
H1	S.mexicana	1998	898	0	0	15
H1	S.mexicana	1998	922	0	0	16
H1	S.mexicana	1998	942	0	0	2
H1	S.mexicana	1998	987	0	0	0
H1	S.mexicana	1998	I3	0	0	3
H1	S.mexicana	1999	6	0	0	5
H1	S.mexicana	1999	7	0	0	4
H1	S.mexicana	1999	9	0	0	3
H1	S.mexicana	1999	12	0	0	2
H1	S.mexicana	1999	12	0	0	3
H1	S.mexicana	1999	12	3	0.333333	5
H1	S.mexicana	1999	12	4	0.4	6
H1	S.mexicana	1999	13	0	0	6
H1	S.mexicana	1999	13	0	0	5
H1	S.mexicana	1999	14	0	0	4
H1	S.mexicana	1999	16	3	0.375	3
H1	S.mexicana	1999	17	1	0.111111	5
H1	S.mexicana	1999	18	0	0	4
H1	S.mexicana	1999	19	3	0.375	4
H1	S.mexicana	1999	20	3	0.3	5
H1	S.mexicana	1999	25	0	0	6
H1	S.mexicana	1999	25	1	0.1	6
H1	S.mexicana	1999	26	0	0	4
H1	S.mexicana	1999	29	3	0.428571	5
H1	S.mexicana	1999	31	5	0.454545	7
H1	S.mexicana	1999	33	2	0.285714	3
H1	S.mexicana	1999	35	1	0.125	5
H1	S.mexicana	1999	36	4	0.571429	5
H1	S.mexicana	1999	41	4	0.5	5
H1	S.mexicana	1999	42	0	0	4
H1	S.mexicana	1999	45	3	0.375	5
H1	S.mexicana	1999	51	2	0.2	7
H1	S.mexicana	1999	54	4	0.444444	6
H1	S.mexicana	1999	55	5	0.5	7
H1	S.mexicana	1999	58	0	0	4
H1	S.mexicana	1999	58	2	0.285714	4
H1	S.mexicana	1999	68	6	0.5	7
H1	S.mexicana	1999	69	2	0.285714	4
H1	S.mexicana	1999	74	7	0.7	8
H1	S.mexicana	1999	79	8	0.571429	9
H1	S.mexicana	1999	92	2	0.25	5
H1	S.mexicana	1999	92	6	0.545455	7
H1	S.mexicana	1999	96	2	0.2	6
H1	S.mexicana	1999	137	6	0.461538	9
H1	S.mexicana	1999	181	2	0.2	6
H1	S.mexicana	1999	184	6	0.461538	9
H1	S.mexicana	1999	189	5	0.555556	7
H1	S.mexicana	1999	235	10	0.454545	13
H1	S.mexicana	1999	266	5	0.3125	9
H1	S.mexicana	1999	276	0	0	2
H1	S.mexicana	1999	294	0	0	4
H1	S.mexicana	1999	305	0	0	3
H1	S.mexicana	1999	344	0	0	0
H1	S.mexicana	1999	401	0	0	5
H1	S.mexicana	1999	411	0	0	5
H1	S.mexicana	1999	425	0	0	0
H1	S.mexicana	1999	460	0	0	2
H1	S.mexicana	1999	550	0	0	10
H1	S.mexicana	1999	585	0	0	7
H1	S.mexicana	1999	617	0	0	8
H1	S.mexicana	1999	651	0	0	8
H1	S.mexicana	1999	766	0	0	10
H1	S.mexicana	1999	795	0	0	2
H1	S.mexicana	1999	806	0	0	18
H1	S.mexicana	1999	821	0	0	9
H1	S.mexicana	1999	852	0	0	4
H1	S.mexicana	1999	868	0	0	9
H1	S.mexicana	1999	882	0	0	0
H1	S.mexicana	1999	893	0	0	0
H1	S.mexicana	1999	912	0	0	11
H1	S.mexicana	1999	926	0	0	6
H1	S.mexicana	1999	991	0	0	0
H1	S.mexicana	1999	1055	0	0	8
H1	S.mexicana	1999	I3	0	0	3
H1	S.mexicana	1999	I3	0	0	3
H1	S.mexicana	1999	I3	0	0	1
H1	S.mexicana	1999	I3	0	0	2
H1	S.mexicana	1999	I3	0	0	5
H1	S.mexicana	1999	I3	0	0	3
H1	S.mexicana	1999	I3	0	0	4
H1	S.mexicana	1999	I3	0	0	0
H1	S.mexicana	1999	I3	2	0	4
H1	S.mexicana	1999	I3	0	0	3
H1	S.mexicana	1999	I3	0	0	4
H1	S.mexicana	1999	I3	0	0	6
H1	S.mexicana	1999	I3	0	0	6
H1	S.mexicana	1999	I3	0	0	5
H1	S.mexicana	1999	I3	0	0	3
H1	S.mexicana	1999	I3	0	0	4
H1	S.mexicana	1999	I3	0	0	2
H1	S.mexicana	1999	I3	0	0	1
H1	S.mexicana	1999	I3	0	0	3
H1	S.mexicana	1999	I3	0	0	2
H1	S.mexicana	1999	I3	0	0	1
H1	S.mexicana	1999	I3	1	0.0714286	6
H1	S.mexicana	1999	I3	2	0.333333	1
H1	S.mexicana	1999	I3	3	0.333333	1
H1	S.mexicana	1999	I3	3	0.333333	6
H1	S.mexicana	2000	7	1	0.125	5
H1	S.mexicana	2000	7	3	0.333333	5
H1	S.mexicana	2000	7	3	0.375	4
H1	S.mexicana	2000	7	5	0.5	5
H1	S.mexicana	2000	10	4	0.444444	3
H1	S.mexicana	2000	11	3	0.6	3
H1	S.mexicana	2000	13	4	0.5	4
H1	S.mexicana	2000	14	3	0.5	5
H1	S.mexicana	2000	14	6	0.666667	3
H1	S.mexicana	2000	14	6	0.75	3
H1	S.mexicana	2000	14	9	0.818182	5
H1	S.mexicana	2000	17	3	0.6	4
H1	S.mexicana	2000	17	7	0.875	4
H1	S.mexicana	2000	19	8	0.727273	6
H1	S.mexicana	2000	21	4	0.666667	4
H1	S.mexicana	2000	22	5	0.714286	2
H1	S.mexicana	2000	22	6	0.75	6
H1	S.mexicana	2000	23	3	0.428571	3
H1	S.mexicana	2000	23	4	0.571429	3
H1	S.mexicana	2000	23	6	0.6	5
H1	S.mexicana	2000	24	6	0.75	5
H1	S.mexicana	2000	28	5	0.833333	4
H1	S.mexicana	2000	30	4	0.571429	3
H1	S.mexicana	2000	31	7	0.777778	5
H1	S.mexicana	2000	37	5	1	2
H1	S.mexicana	2000	39	4	0.4	4
H1	S.mexicana	2000	42	5	0.833333	5
H1	S.mexicana	2000	50	2	0.666667	2
H1	S.mexicana	2000	52	9	0.9	5
H1	S.mexicana	2000	58	5	1	0
H1	S.mexicana	2000	60	5	0.714286	5
H1	S.mexicana	2000	60	8	0.8	5
H1	S.mexicana	2000	64	4	0.8	3
H1	S.mexicana	2000	69	5	0.714286	6
H1	S.mexicana	2000	72	5	1	3
H1	S.mexicana	2000	73	5	0.714286	5
H1	S.mexicana	2000	73	3	1	1
H1	S.mexicana	2000	76	4	0.666667	5
H1	S.mexicana	2000	78	7	0.777778	6
H1	S.mexicana	2000	79	2	0.4	0
H1	S.mexicana	2000	95	3	0.6	4
H1	S.mexicana	2000	105	1	0.125	5
H1	S.mexicana	2000	116	1	0.125	4
H1	S.mexicana	2000	145	1	0.125	5
H1	S.mexicana	2000	191	6	0.666667	5
H1	S.mexicana	2000	212	0	0	0
H1	S.mexicana	2000	215	0	0	0
H1	S.mexicana	2000	I3	0	0	5
H1	S.mexicana	2000	I3	0	0	3
H1	S.mexicana	2000	I3	0	0	2
H1	S.mexicana	2000	I3	3	0.3	0
H1	S.mexicana	2000	I3	3	0.333333	4
H1	S.mexicana	2000	I3	5	0.625	3
H1	S.yapa	1998	3	2	0.4	3
H1	S.yapa	1998	5	0	0	3
H1	S.yapa	1998	10	2	0.333333	4
H1	S.yapa	1998	28	0	0	3
H1	S.yapa	1998	28	0	0	3
H1	S.yapa	1998	59	2	0.4	4
H1	S.yapa	1998	60	0	0	3
H1	S.yapa	1998	62	0	0	2
H1	S.yapa	1998	67	3	0.6	3
H1	S.yapa	1998	68	0	0	3
H1	S.yapa	1998	85	3	0.428571	5
H1	S.yapa	1998	88	1	0.166667	5
H1	S.yapa	1998	110	3	0.333333	5
H1	S.yapa	1998	148	2	0.333333	5
H1	S.yapa	1998	153	1	0.142857	4
H1	S.yapa	1998	156	0	0	4
H1	S.yapa	1998	162	2	0.25	4
H1	S.yapa	1998	162	7	0.777778	5
H1	S.yapa	1998	305	0	0	6
H1	S.yapa	1998	365	0	0	5
H1	S.yapa	1998	389	0	0	11
H1	S.yapa	1998	412	0	0	10
H1	S.yapa	1998	421	0	0	17
H1	S.yapa	1998	426	0	0	8
H1	S.yapa	1998	427	0	0	8
H1	S.yapa	1998	472	0	0	6
H1	S.yapa	1998	480	0	0	9
H1	S.yapa	1998	564	0	0	9
H1	S.yapa	1998	606	0	0	9
H1	S.yapa	1998	688	0	0	9
H1	S.yapa	1998	I3	0	0	5
H1	S.yapa	1998	I3	0	0	2
H1	S.yapa	1998	I3	0	0	4
H1	S.yapa	1998	I3	0	0	3
H1	S.yapa	1998	I3	0	0	3
H1	S.yapa	1998	I3	0	0	2
H1	S.yapa	1998	I3	0	0	3
H1	S.yapa	1998	I3	0	0	5
H1	S.yapa	1998	I3	0	0	5
H1	S.yapa	1998	I3	0	0	5
H1	S.yapa	1998	I3	0	0	5
H1	S.yapa	1998	I3	0	0	2
H1	S.yapa	1998	I3	0	0	1
H1	S.yapa	1998	I3	0	0	1
H1	S.yapa	1998	I3	0	0	3
H1	S.yapa	1998	I3	0	0	1
H1	S.yapa	1998	I3	0	0	3
H1	S.yapa	1998	I3	0	0	3
H1	S.yapa	1998	I3	0	0	4
H1	S.yapa	1998	I3	0	0	2
H1	S.yapa	1998	I3	0	0	1
H1	S.yapa	1998	I3	0	0	2
H1	S.yapa	1998	I3	0	0	2
H1	S.yapa	1999	2	2	0.333333	4
H1	S.yapa	1999	9	0	0	2
H1	S.yapa	1999	9.5	3	0.272727	4
H1	S.yapa	1999	10	1	0.111111	5
H1	S.yapa	1999	36	0	0	5
H1	S.yapa	1999	41	1	0.142857	4
H1	S.yapa	1999	63	2	0.222222	5
H1	S.yapa	1999	69	1	0.142857	5
H1	S.yapa	1999	75	2	0.25	5
H1	S.yapa	1999	84	6	0.6	8
H1	S.yapa	1999	90	4	0.5	6
H1	S.yapa	1999	123	5	0.454545	9
H1	S.yapa	1999	156	5	0.454545	8
H1	S.yapa	1999	157	5	0.357143	11
H1	S.yapa	1999	164	4	0.333333	8
H1	S.yapa	1999	176	7	0.636364	9
H1	S.yapa	1999	180	5	0.555556	7
H1	S.yapa	1999	192	4	0.4	5
H1	S.yapa	1999	230	1	0.0909091	5
H1	S.yapa	1999	240	0	0	3
H1	S.yapa	1999	428	0	0	0
H1	S.yapa	1999	475	0	0	0
H1	S.yapa	1999	510	0	0	3
H1	S.yapa	1999	568	0	0	0
H1	S.yapa	1999	608	0	0	0
H1	S.yapa	1999	691	0	0	4
H1	S.yapa	1999	I3	0	0	4
H1	S.yapa	1999	I3	0	0	1
H1	S.yapa	1999	I3	0	0	3
H1	S.yapa	1999	I3	0	0	4
H1	S.yapa	1999	I3	0	0	2
H1	S.yapa	1999	I3	0	0	4
H1	S.yapa	1999	I3	0	0	2
H1	S.yapa	1999	I3	0	0	1
H1	S.yapa	1999	I3	0	0	4
H1	S.yapa	1999	I3	0	0	2
H1	S.yapa	1999	I3	0	0	2
H1	S.yapa	1999	I3	0	0	3
H1	S.yapa	1999	I3	0	0	2
H1	S.yapa	1999	I3	0	0	3
H1	S.yapa	1999	I3	0	0	3
H1	S.yapa	1999	I3	0	0	2
H1	S.yapa	1999	I3	1	0.2	3
H1	S.yapa	1999	I3	1	0.2	1
H1	S.yapa	1999	I3	3	0.5	2
H1	S.yapa	1999	I3	5	0.714286	3
H1	S.yapa	2000	4	4	0.666667	4
H1	S.yapa	2000	9	3	0.428571	4
H1	S.yapa	2000	13	7	0.777778	5
H1	S.yapa	2000	41	6	0.75	5
H1	S.yapa	2000	49	8	0.8	5
H1	S.yapa	2000	63	7	0.777778	6
H1	S.yapa	2000	71	6	0.857143	3
H1	S.yapa	2000	78	6	0.857143	4
H1	S.yapa	2000	87	4	0.666667	4
H1	S.yapa	2000	91	6	0.75	6
H1	S.yapa	2000	108	3	0.4	4
H1	S.yapa	2000	127	7	0.777778	5
H1	S.yapa	2000	164	7	0.777778	6
H1	S.yapa	2000	168	4	0.363636	7
H1	S.yapa	2000	179	8	0.8	4
H1	S.yapa	2000	184	5	0.625	6
H1	S.yapa	2000	190	6	0.666667	7
H1	S.yapa	2000	243	0	0	0
H1	S.yapa	2000	246	12	0.8	11
H1	S.yapa	2000	I3	0	0	0
H1	S.yapa	2000	I3	0	0	2
H1	S.yapa	2000	I3	0	0	1
H1	S.yapa	2000	I3	0	0	3
H1	S.yapa	2000	I3	0	0	0
H1	S.yapa	2000	I3	1	0.166667	3
H1	S.yapa	2000	I3	1	0.166667	3
H1	S.yapa	2000	I3	1	0.2	2
H1	S.yapa	2000	I3	1	0.25	2
H1	S.yapa	2000	I3	1	0.25	2
H1	S.yapa	2000	I3	1	0.333333	0
H1	S.yapa	2000	I3	2	0.333333	2
H1	S.yapa	2000	I3	2	0.4	1
H1	S.yapa	2000	I3	2	0.4	1
H1	S.yapa	2000	I3	2	0.5	1
H1	S.yapa	2000	I3	2	0.5	1
H1	S.yapa	2000	I3	4	0.571429	3
H1	S.yapa	2000	I3	6	0.75	4
H1	S.yapa	2000	I3	5	0.833333	4
H1	S.yapa	2000	I3	5	0.833333	4
H1	S.yapa	2000	I3	5	0.833333	4
H2	S.mexicana	1998	20	2	0.285714	5
H2	S.mexicana	1998	22	3	0.333333	6
H2	S.mexicana	1998	27	0	0	2
H2	S.mexicana	1998	32	2	0.222222	5
H2	S.mexicana	1998	33	0	0	4
H2	S.mexicana	1998	33	1	0.111111	5
H2	S.mexicana	1998	33	2	0.222222	6
H2	S.mexicana	1998	41	0	0	3
H2	S.mexicana	1998	41	2	0.222222	4
H2	S.mexicana	1998	47	1	0.166667	4
H2	S.mexicana	1998	48	1	0.25	3
H2	S.mexicana	1998	49	2	0.25	5
H2	S.mexicana	1998	50	4	0.333333	7
H2	S.mexicana	1998	51	1	0.1	5
H2	S.mexicana	1998	52	2	0.333333	3
H2	S.mexicana	1998	52	4	0.363636	8
H2	S.mexicana	1998	52	3	0.5	5
H2	S.mexicana	1998	53	3	0.3	5
H2	S.mexicana	1998	55	2	0.222222	5
H2	S.mexicana	1998	56	2	0.333333	5
H2	S.mexicana	1998	57	4	0.444444	7
H2	S.mexicana	1998	59	6	0.75	7
H2	S.mexicana	1998	62	1	0.111111	5
H2	S.mexicana	1998	62	2	0.222222	4
H2	S.mexicana	1998	67	3	0.5	4
H2	S.mexicana	1998	67	3	0.75	4
H2	S.mexicana	1998	69	0	0	1
H2	S.mexicana	1998	70	0	0	2
H2	S.mexicana	1998	70	2	0.4	4
H2	S.mexicana	1998	74	2	0.222222	5
H2	S.mexicana	1998	75	3	0.6	4
H2	S.mexicana	1998	76	3	0.375	5
H2	S.mexicana	1998	80	2	0.222222	5
H2	S.mexicana	1998	81	1	0.111111	5
H2	S.mexicana	1998	89	2	0.222222	5
H2	S.mexicana	1998	89	5	0.3125	9
H2	S.mexicana	1998	97	1	0.1	5
H2	S.mexicana	1998	98	3	0.5	4
H2	S.mexicana	1998	100	1	0.2	4
H2	S.mexicana	1998	101	0	0	5
H2	S.mexicana	1998	104	3	0.214286	7
H2	S.mexicana	1998	109	2	0.222222	4
H2	S.mexicana	1998	110	5	0.454545	6
H2	S.mexicana	1998	116	3	0.375	6
H2	S.mexicana	1998	120	0	0	3
H2	S.mexicana	1998	120	2	0.25	6
H2	S.mexicana	1998	122	3	0.333333	6
H2	S.mexicana	1998	122	3	0.333333	6
H2	S.mexicana	1998	122	3	0.6	5
H2	S.mexicana	1998	126	0	0	3
H2	S.mexicana	1998	140	4	0.4	7
H2	S.mexicana	1998	152	6	0.6	9
H2	S.mexicana	1998	154	2	0.333333	4
H2	S.mexicana	1998	154	7	0.466667	9
H2	S.mexicana	1998	155	8	0.380952	13
H2	S.mexicana	1998	160	4	0.5	7
H2	S.mexicana	1998	165	6	0.5	9
H2	S.mexicana	1998	180	1	0.166667	5
H2	S.mexicana	1998	180	5	0.625	7
H2	S.mexicana	1998	208	3	0.1875	9
H2	S.mexicana	1998	213	0	0	2
H2	S.mexicana	1998	220	6	0.666667	8
H2	S.mexicana	1998	224	7	0.368421	13
H2	S.mexicana	1998	228	0	0	3
H2	S.mexicana	1998	283	8	0.571429	6
H2	S.mexicana	1998	344	0	0	0
H2	S.mexicana	1998	351	0	0	14
H2	S.mexicana	1998	378	7	0.7	9
H2	S.mexicana	1998	390	0	0.733333	14
H2	S.mexicana	1998	470	0	0	0
H2	S.mexicana	1998	490	0	0	0
H2	S.mexicana	1998	531	0	0	0
H2	S.mexicana	1998	563	0	0	9
H2	S.mexicana	1998	582	0	0	4
H2	S.mexicana	1998	583	0	0	2
H2	S.mexicana	1998	583	0	0	13
H2	S.mexicana	1998	808	0	0	7
H2	S.mexicana	1998	963	0	0	6
H2	S.mexicana	1998	972	0	0	7
H2	S.mexicana	1998	I3	0	0	3
H2	S.mexicana	1998	I3	0	0	0
H2	S.mexicana	1998	I3	0	0	2
H2	S.mexicana	1998	I3	0	0	3
H2	S.mexicana	1998	I3	0	0	4
H2	S.mexicana	1998	I3	0	0	4
H2	S.mexicana	1998	I3	0	0	4
H2	S.mexicana	1998	I3	1	0.125	4
H2	S.mexicana	1998	I3	1	0.2	2
H2	S.mexicana	1998	I3	2	0.333333	3
H2	S.mexicana	1999	13	0	0	0
H2	S.mexicana	1999	13	3	0	3
H2	S.mexicana	1999	20	5	0.555556	6
H2	S.mexicana	1999	22	6	0.6	7
H2	S.mexicana	1999	32	0	0	4
H2	S.mexicana	1999	33	0	0	4
H2	S.mexicana	1999	33	0	0	5
H2	S.mexicana	1999	33	5	0.454545	7
H2	S.mexicana	1999	41	0	0	4
H2	S.mexicana	1999	41	1	0.142857	4
H2	S.mexicana	1999	47	4	0.444444	6
H2	S.mexicana	1999	48	2	0.25	6
H2	S.mexicana	1999	49	3	0.375	5
H2	S.mexicana	1999	50	4	0.363636	8
H2	S.mexicana	1999	51	0	0	5
H2	S.mexicana	1999	52	0	0	5
H2	S.mexicana	1999	52	3	0.333333	7
H2	S.mexicana	1999	52	4	0.4	6
H2	S.mexicana	1999	53	0	0	5
H2	S.mexicana	1999	55	0	0	4
H2	S.mexicana	1999	56	1	0.111111	6
H2	S.mexicana	1999	57	2	0.222222	6
H2	S.mexicana	1999	59	2	0.333333	5
H2	S.mexicana	1999	62	0	0	4
H2	S.mexicana	1999	67	2	0.333333	5
H2	S.mexicana	1999	67	3	0.5	5
H2	S.mexicana	1999	70	0	0	5
H2	S.mexicana	1999	70	1	0.166667	4
H2	S.mexicana	1999	74	7	0.636364	8
H2	S.mexicana	1999	75	2	0.333333	5
H2	S.mexicana	1999	76	3	0.333333	7
H2	S.mexicana	1999	80	0	0	5
H2	S.mexicana	1999	81	1	0.142857	3
H2	S.mexicana	1999	89	0	0	4
H2	S.mexicana	1999	89	2	0.25	4
H2	S.mexicana	1999	97	3	0.3	6
H2	S.mexicana	1999	98	4	0.444444	8
H2	S.mexicana	1999	100	0	0	4
H2	S.mexicana	1999	101	3	0.272727	6
H2	S.mexicana	1999	104	4	0.307692	9
H2	S.mexicana	1999	109	0	0	4
H2	S.mexicana	1999	110	3	0.428571	6
H2	S.mexicana	1999	116	4	0.444444	6
H2	S.mexicana	1999	120	1	0.125	4
H2	S.mexicana	1999	120	4	0.444444	6
H2	S.mexicana	1999	122	2	0.25	5
H2	S.mexicana	1999	122	2	0.25	5
H2	S.mexicana	1999	122	5	0.5	7
H2	S.mexicana	1999	126	0	0	4
H2	S.mexicana	1999	140	1	0.111111	6
H2	S.mexicana	1999	152	3	0.3	7
H2	S.mexicana	1999	154	1	0.166667	4
H2	S.mexicana	1999	154	5	0.384615	11
H2	S.mexicana	1999	155	1	0.0833333	7
H2	S.mexicana	1999	160	5	0.357143	11
H2	S.mexicana	1999	180	3	0.272727	7
H2	S.mexicana	1999	208	10	0.5	14
H2	S.mexicana	1999	224	16	0.615385	20
H2	S.mexicana	1999	283	0	0	4
H2	S.mexicana	1999	369	0	0	1
H2	S.mexicana	1999	378	0	0	3
H2	S.mexicana	1999	449	0	0	0
H2	S.mexicana	1999	493	0	0	1
H2	S.mexicana	1999	500	0	0	0
H2	S.mexicana	1999	543	0	0	10
H2	S.mexicana	1999	565	0	0	5
H2	S.mexicana	1999	607	0	0	0
H2	S.mexicana	1999	612	0	0	6
H2	S.mexicana	1999	625	0	0	0
H2	S.mexicana	1999	812	0	0	6
H2	S.mexicana	1999	947	0	0	5
H2	S.mexicana	1999	992	0	0	8
H2	S.mexicana	1999	I3	0	0	1
H2	S.mexicana	1999	I3	0	0	1
H2	S.mexicana	1999	I3	0	0	1
H2	S.mexicana	1999	I3	0	0	2
H2	S.mexicana	1999	I3	0	0	2
H2	S.mexicana	1999	I3	0	0	2
H2	S.mexicana	1999	I3	0	0	3
H2	S.mexicana	1999	I3	4	0.285714	4
H2	S.mexicana	2000	9	4	0.571429	3
H2	S.mexicana	2000	9	4	0.666667	4
H2	S.mexicana	2000	13	3	0.375	5
H2	S.mexicana	2000	24	3	0.375	4
H2	S.mexicana	2000	32	2	0.5	3
H2	S.mexicana	2000	33	0	0	2
H2	S.mexicana	2000	36	4	0.666667	4
H2	S.mexicana	2000	37	4	0.666667	5
H2	S.mexicana	2000	38	5	0.625	3
H2	S.mexicana	2000	42	9	1	4
H2	S.mexicana	2000	46	2	0.5	2
H2	S.mexicana	2000	47	2	0.333333	3
H2	S.mexicana	2000	49	7	0.777778	5
H2	S.mexicana	2000	51	3	0.428571	4
H2	S.mexicana	2000	51	6	0.6	4
H2	S.mexicana	2000	51	5	0.625	4
H2	S.mexicana	2000	52	4	0.8	3
H2	S.mexicana	2000	52	7	0.875	3
H2	S.mexicana	2000	52	9	0.9	5
H2	S.mexicana	2000	53	5	0.555556	4
H2	S.mexicana	2000	56	1	0.125	4
H2	S.mexicana	2000	61	5	0.714286	5
H2	S.mexicana	2000	61	7	0.777778	5
H2	S.mexicana	2000	69	4	0.5	5
H2	S.mexicana	2000	70	6	0.75	4
H2	S.mexicana	2000	72	7	0.7	5
H2	S.mexicana	2000	76	0	0	4
H2	S.mexicana	2000	80	4	0.666667	5
H2	S.mexicana	2000	81	2	0.285714	5
H2	S.mexicana	2000	81	3	0.428571	4
H2	S.mexicana	2000	82	10	0.769231	9
H2	S.mexicana	2000	84	3	0.5	4
H2	S.mexicana	2000	84	6	0.545455	6
H2	S.mexicana	2000	84	7	0.777778	5
H2	S.mexicana	2000	92	4	0.4	6
H2	S.mexicana	2000	101	3	0.428571	4
H2	S.mexicana	2000	102	2	0.333333	4
H2	S.mexicana	2000	102	6	0.6	6
H2	S.mexicana	2000	104	9	1	5
H2	S.mexicana	2000	106	4	0.4	7
H2	S.mexicana	2000	107	6	0.545455	6
H2	S.mexicana	2000	108	5	0.555556	5
H2	S.mexicana	2000	117	3	0.375	5
H2	S.mexicana	2000	119	3	0.5	4
H2	S.mexicana	2000	120	4	0.571429	5
H2	S.mexicana	2000	124	4	0.5	4
H2	S.mexicana	2000	124	7	0.875	4
H2	S.mexicana	2000	127	3	0.428571	3
H2	S.mexicana	2000	130	4	0.571429	4
H2	S.mexicana	2000	145	5	0.416667	7
H2	S.mexicana	2000	160	6	0.857143	4
H2	S.mexicana	2000	160	4	1	0
H2	S.mexicana	2000	172	6	1	0
H2	S.mexicana	2000	185	4	1	0
H2	S.mexicana	2000	188	14	0.875	10
H2	S.mexicana	2000	195	5	0.357143	8
H2	S.mexicana	2000	222	5	0.454545	7
H2	S.mexicana	2000	247	4	0.307692	8
H2	S.mexicana	2000	274	5	0.384615	9
H2	S.mexicana	2000	290	0	0	0
H2	S.mexicana	2000	300	13	0.590909	9
H2	S.mexicana	2000	315	0	0	4
H2	S.mexicana	2000	378	0	0	NA
H2	S.mexicana	2000	466	0	0	NA
H2	S.mexicana	2000	503	0	0.636364	NA
H2	S.mexicana	2000	525	0	0	NA
H2	S.mexicana	2000	545	0	0	NA
H2	S.mexicana	2000	606	0	0	NA
H2	S.mexicana	2000	631	0	0	NA
H2	S.mexicana	2000	633	0	0	NA
H2	S.mexicana	2000	638	0	0	NA
H2	S.mexicana	2000	946	0	0	NA
H2	S.mexicana	2000	982	0	0	NA
H2	S.mexicana	2000	1028	0	0	NA
H2	S.mexicana	2000	I3	0	0	8
H2	S.mexicana	2000	I3	0	0	4
H2	S.mexicana	2000	I3	0	0	2
H2	S.mexicana	2000	I3	0	0	0
H2	S.mexicana	2000	I3	0	0	1
H2	S.mexicana	2000	I3	0	0	0
H2	S.mexicana	2000	I3	0	0	1
H2	S.mexicana	2000	I3	0	0	0
H2	S.mexicana	2000	I3	0	0	0
H2	S.mexicana	2000	I3	0	0	0
H2	S.mexicana	2000	I3	0	0	0
H2	S.mexicana	2000	I3	1	0.166667	0
H2	S.mexicana	2000	I3	6	0.5	6
H2	S.mexicana	2000	I3	0	0.571429	0
H2	S.mexicana	2000	I3	5	0.714286	0
H2	S.yapa	1998	10	1	0.2	3
H2	S.yapa	1998	10	3	0.375	5
H2	S.yapa	1998	11	0	0	4
H2	S.yapa	1998	12	2	0.222222	5
H2	S.yapa	1998	13	2	0.25	5
H2	S.yapa	1998	19	0	0	2
H2	S.yapa	1998	20	0	0	3
H2	S.yapa	1998	20	1	0.111111	4
H2	S.yapa	1998	20	1	0.166667	4
H2	S.yapa	1998	24	2	0.25	3
H2	S.yapa	1998	30	3	0.375	5
H2	S.yapa	1998	32	1	0.125	4
H2	S.yapa	1998	33	2	0.333333	3
H2	S.yapa	1998	35	2	0.25	4
H2	S.yapa	1998	36	4	0.333333	7
H2	S.yapa	1998	40	2	0.333333	4
H2	S.yapa	1998	44	0	0	2
H2	S.yapa	1998	47	2	0.333333	4
H2	S.yapa	1998	48	0	0	3
H2	S.yapa	1998	48	2	0.25	4
H2	S.yapa	1998	56	1	0.142857	2
H2	S.yapa	1998	62	4	0.444444	7
H2	S.yapa	1998	63	2	0.222222	5
H2	S.yapa	1998	67	1	0.2	3
H2	S.yapa	1998	69	2	0.222222	5
H2	S.yapa	1998	75	2	0.2	6
H2	S.yapa	1998	80	2	0.25	4
H2	S.yapa	1998	81	2	0.25	4
H2	S.yapa	1998	83	2	0.222222	4
H2	S.yapa	1998	84	3	0.6	4
H2	S.yapa	1998	97	1	0.111111	5
H2	S.yapa	1998	114	2	0.2	5
H2	S.yapa	1998	118	3	0.428571	6
H2	S.yapa	1998	121	0	0	3
H2	S.yapa	1998	134	0	0	3
H2	S.yapa	1998	148	0	0	0
H2	S.yapa	1998	176	0	0	0
H2	S.yapa	1998	177	3	0.428571	6
H2	S.yapa	1998	196	2	0.25	7
H2	S.yapa	1998	229	0	0	5
H2	S.yapa	1998	254	0	0	3
H2	S.yapa	1998	274	0	0	4
H2	S.yapa	1998	296	0	0	8
H2	S.yapa	1998	399	0	0	10
H2	S.yapa	1998	432	0	0	11
H2	S.yapa	1998	531	0	0	2
H2	S.yapa	1998	I3	0	0	3
H2	S.yapa	1998	I3	0	0	4
H2	S.yapa	1998	I3	0	0	0
H2	S.yapa	1998	I3	0	0	3
H2	S.yapa	1998	I3	0	0	0
H2	S.yapa	1998	I3	0	0	2
H2	S.yapa	1998	I3	0	0	3
H2	S.yapa	1998	I3	0	0	4
H2	S.yapa	1998	I3	0	0	6
H2	S.yapa	1998	I3	0	0	0
H2	S.yapa	1998	I3	1	0.142857	2
H2	S.yapa	1998	I3	1	0.166667	2
H2	S.yapa	1998	I3	1	0.166667	4
H2	S.yapa	1998	I3	1	0.166667	4
H2	S.yapa	1998	I3	1	0.166667	2
H2	S.yapa	1998	I3	1	0.2	2
H2	S.yapa	1998	I3	2	0.222222	5
H2	S.yapa	1998	I3	4	0.666667	3
H2	S.yapa	1998	I3	4	0.666667	3
H2	S.yapa	1998	I3	5	0.714286	4
H2	S.yapa	1999	8	3	0.375	6
H2	S.yapa	1999	10	0	0	4
H2	S.yapa	1999	10	1	0.1	6
H2	S.yapa	1999	20	2	0.25	5
H2	S.yapa	1999	21	0	0	3
H2	S.yapa	1999	23	2	0.333333	4
H2	S.yapa	1999	28	2	0.285714	5
H2	S.yapa	1999	30	2	0.25	5
H2	S.yapa	1999	31.5	4	0.571429	5
H2	S.yapa	1999	32	1	0.166667	3
H2	S.yapa	1999	33	2	0.25	5
H2	S.yapa	1999	35	1	0.2	3
H2	S.yapa	1999	36	3	0.333333	7
H2	S.yapa	1999	42	3	0.333333	6
H2	S.yapa	1999	46	2	0.222222	6
H2	S.yapa	1999	49	2	0.333333	4
H2	S.yapa	1999	52	0	0	4
H2	S.yapa	1999	55	2	0.285714	5
H2	S.yapa	1999	59	0	0	5
H2	S.yapa	1999	62	1	0.142857	4
H2	S.yapa	1999	63	4	0.363636	8
H2	S.yapa	1999	67	2	0.25	5
H2	S.yapa	1999	69	0	0	5
H2	S.yapa	1999	69	7	0.5	11
H2	S.yapa	1999	85	0	0	3
H2	S.yapa	1999	86	2	0.25	6
H2	S.yapa	1999	89	1	0.1	6
H2	S.yapa	1999	95	0	0	5
H2	S.yapa	1999	95	4	0.666667	5
H2	S.yapa	1999	102	1	0.125	4
H2	S.yapa	1999	128	0	0	4
H2	S.yapa	1999	132	1	0.142857	4
H2	S.yapa	1999	142	2	0.222222	6
H2	S.yapa	1999	159	2	0.166667	8
H2	S.yapa	1999	190	0	0	7
H2	S.yapa	1999	203	4	0.307692	8
H2	S.yapa	1999	252	0	0	5
H2	S.yapa	1999	260	0	0	6
H2	S.yapa	1999	284	0	0	9
H2	S.yapa	1999	321	0	0	2
H2	S.yapa	1999	402	0	0	1
H2	S.yapa	1999	464	0	0	4
H2	S.yapa	1999	517	0	0	6
H2	S.yapa	1999	I3	0	0	2
H2	S.yapa	1999	I3	0	0	4
H2	S.yapa	1999	I3	0	0	0
H2	S.yapa	1999	I3	0	0	0
H2	S.yapa	1999	I3	0	0	0
H2	S.yapa	1999	I3	0	0	2
H2	S.yapa	1999	I3	0	0	6
H2	S.yapa	1999	I3	0	0	4
H2	S.yapa	1999	I3	0	0	5
H2	S.yapa	1999	I3	0	0	4
H2	S.yapa	1999	I3	0	0	4
H2	S.yapa	1999	I3	0	0	4
H2	S.yapa	1999	I3	0	0	0
H2	S.yapa	1999	I3	0	0	6
H2	S.yapa	1999	I3	0	0	4
H2	S.yapa	1999	I3	0	0	5
H2	S.yapa	1999	I3	0	0	5
H2	S.yapa	1999	I3	0	0	6
H2	S.yapa	1999	I3	0	0	2
H2	S.yapa	1999	I3	0	0	2
H2	S.yapa	1999	I3	1	0.125	7
H2	S.yapa	1999	I3	2	0.285714	5
H2	S.yapa	1999	I3	3	0.333333	6
H2	S.yapa	1999	I3	8	0.444444	12
H2	S.yapa	1999	I3	2	0.5	2
H2	S.yapa	2000	5	13	0.866667	5
H2	S.yapa	2000	10	7	0.777778	5
H2	S.yapa	2000	10	8	0.888889	5
H2	S.yapa	2000	11	7	1	4
H2	S.yapa	2000	18	5	0.454545	3
H2	S.yapa	2000	18	4	0.571429	3
H2	S.yapa	2000	20	6	0.857143	4
H2	S.yapa	2000	22	5	0.833333	3
H2	S.yapa	2000	27	3	0.6	3
H2	S.yapa	2000	28	3	0.428571	4
H2	S.yapa	2000	28	5	0.625	4
H2	S.yapa	2000	31	5	0.555556	5
H2	S.yapa	2000	38	3	0.5	3
H2	S.yapa	2000	38	6	0.666667	5
H2	S.yapa	2000	38	4	0.8	4
H2	S.yapa	2000	39	3	0.428571	4
H2	S.yapa	2000	52	2	0.333333	4
H2	S.yapa	2000	52	5	0.555556	5
H2	S.yapa	2000	52	5	0.625	5
H2	S.yapa	2000	63	3	0.375	5
H2	S.yapa	2000	63	8	0.888889	4
H2	S.yapa	2000	68	6	0.75	5
H2	S.yapa	2000	68	7	0.777778	5
H2	S.yapa	2000	68	7	0.875	5
H2	S.yapa	2000	76	8	0.8	6
H2	S.yapa	2000	80	7	0.875	4
H2	S.yapa	2000	82	4	0.444444	4
H2	S.yapa	2000	89	4	0.444444	5
H2	S.yapa	2000	89	5	0.625	3
H2	S.yapa	2000	90	7	0.777778	4
H2	S.yapa	2000	101	5	0.555556	4
H2	S.yapa	2000	110	6	0.75	5
H2	S.yapa	2000	116	1	0.166667	5
H2	S.yapa	2000	133	5	0.555556	5
H2	S.yapa	2000	142	4	0.571429	4
H2	S.yapa	2000	150	4	0.363636	7
H2	S.yapa	2000	155	5	0.416667	8
H2	S.yapa	2000	190	0	0	5
H2	S.yapa	2000	218	4	0.4	6
H2	S.yapa	2000	223	8	0.533333	7
H2	S.yapa	2000	435	0	0	NA
H2	S.yapa	2000	499	0	0	NA
H2	S.yapa	2000	564	0	0	NA
H2	S.yapa	2000	I3	0	0	3
H2	S.yapa	2000	I3	0	0	1
H2	S.yapa	2000	I3	0	0	1
H2	S.yapa	2000	I3	0	0	1
H2	S.yapa	2000	I3	0	0	1
H2	S.yapa	2000	I3	0	0	2
H2	S.yapa	2000	I3	1	0.166667	2
H2	S.yapa	2000	I3	2	0.333333	2
H2	S.yapa	2000	I3	3	0.5	3
H2	S.yapa	2000	I3	3	0.5	3
H2	S.yapa	2000	I3	4	0.571429	3
H2	S.yapa	2000	I3	5	0.714286	3
H2	S.yapa	2000	I3	6	0.75	4
H2	S.yapa	2000	I3	5	0.833333	2
H2	S.yapa	2000	I3	5	0.833333	4
H2	S.yapa	2000	I3	6	0.857143	2
H2	S.yapa	2000	I3	6	0.857143	5
H2	S.yapa	2000	I3	7	0.875	0
H2	S.yapa	2000	I3	8	0.888889	6
H2	S.yapa	2000	I3	7	1	3
H2	S.yapa	2000	I3	6	1	3
H2	S.yapa	2000	I3	5	1	3
H2	S.yapa	2000	I3	7	1	4
